# Supplementary material for: Contribution of Lateral Gene Transfers to the Genome Composition and Parasitic Ability of Root-Knot Nematodes
Source: PLoS One. 2012 Nov 30;7(11):e50875. doi: 10.1371/journal.pone.0050875 (PMC3511272; doi:10.1371/journal.pone.0050875)
Supplement: Table S2 — Detailed list of the 609 non-redundant root-knot nematode proteins considered as acquired via LGT. For each protein predicted to have been acquired via LGT of non-metazoan origin, a series of information is listed. Accession numbers, presence of a signal peptide (Y), the number of spliceosomal exons are indicated in columns 1, 2 and 3, respectively. The presence of a Pfam protein domain is indicated in columns 4. Gene Ontology (G.O.) terms associated to the protein based on the Pfam domains composition for the three categories ‘Biological Process’, ‘Molecular Function’ and ‘Cellular Component’, are given in columns 5, 7 and 9, respectively. The G.O. slim terms that were the most over-represented in the set of genes acquired via LGT for the ‘Biological Process’ and ‘Molecular Function’ ontologies are indicated in columns 6 and 8, respectively. The column 10 ‘family’ indicates whether the gene belongs to a known family. If this family corresponds to one previously reported LGT case in the literature (listed in Table 1), the whole line is put in bold. The putative substrate/activity of the protein/enzyme is indicated in column 11. Phylogenetic support (presence of a node ‘A’ or ‘A’ and ‘B’) is given in column 12. If none of the searched phylogenetic patterns were retrieved ‘No’ is indicated in this column whereas in cases no phylogenetic tree at all could be constructed ‘No tree’ is indicated. The last three columns indicate, respectively, the list of species in the donor phylogenetic subtree, the simplified taxonomy of the species found, and the short taxonomy (i.e. Bacteria, Fungi, Protist, Plant or Archae). N/A: not applicable. (XLS) [file pone.0050875.s003.xls]

## Sheet: Candidate-HGT
Accession Number	Sign	Exons	Pfam	GO/ Process	Goslim/ Process	GO/ Function	Goslim / Process	GO/ Component	Family	Substrate / activity	Phylo Support	Candidate donor	Taxonomy	Tax short
Minc18650	Y	4	Glyco_hydro_30	lysosome organization, sphingolipid metabolic process		glucosylceramidase activity	hydrolase activity	lysosome	GH30 xylanase	Hemicellulose, xylan	A + B	XANTHOMONAS CAMPESTRIS, XANTHOMONAS ORYZAE, XANTHOMONAS ORYZAE, XANTHOMONAS CAMPESTRIS, XANTHOMONAS AXONOPODIS, CELLVIBRIO JAPONICUS, ERWINIA CHRYSANTHEMI, DICKEYA DADANTII	BACTERIA: GAMMAPROTEOBACTERIA	BACTERIA
Minc09888		4							GH*_GH25		A + B	TETRAHYMENA THERMOPHILA	PROTIST: CILIOPHORA	PROTIST
Minc09178	Y	2	Glyco_hydro_30	lysosome organization,sphingolipid metabolic process		glucosylceramidase activity	hydrolase activity	lysosome	GH30 xylanase	Hemicellulose, xylan	A + B	CATENULISPORA ACIDIPHILA, CELLULOSILYTICUM RUMINICOLA, AEROMONAS PUNCTATA, CLOSTRIDIUM THERMOCELLUM, GEOBACILLUS SP, CLOSTRIDIUM PAPYROSOLVENS, CLOSTRIDIUM CELLULOLYTICUM, BACILLUS SUBTILIS, BACILLUS PUMILUS, BACILLUS AMYLOLIQUEFACIENS, CLOSTRIDIUM ACETOBUTYLICUM, STREPTOMYCES SCABIEI, STREPTOMYCES SVICEUS	BACTERIA: FIRMICUTES, CLOSTRIDIALES, GAMMAPROTEOBACTERIA, ACTINOMYCETALES	BACTERIA
Minc13284		8	Pkinase	protein amino acid phosphorylation	protein modification process	ATP binding, protein kinase activity	protein kinase activity | nucleotide binding				A + B	RHODOPIRELLULA BALTICA	BACTERIA: PLANCTOMYCETES	BACTERIA
Mh_Contig0:145049..145261		2	G-alpha	G-protein coupled receptor protein signaling pathway		guanyl nucleotide binding, signal transducer activity	nucleotide binding				A + B	THALASSIOSIRA PSEUDONANA	PROTIST: STRAMENOPILES	PROTIST
Mh_Contig1230:2564..6337		8	Pribosyltran	nucleoside metabolic process							A + B	SINORHIZOBIUM MELILOTI, RHIZOBIUM SP, SINORHIZOBIUM MEDICAE, NOVOSPHINGOBIUM AROMATICIVORANS, BEIJERINCKIA INDICA	BACTERIA: RHIZOBIALES, ALPHAPROTEOBACTERIA	BACTERIA
Mh_Contig1342:13027..14793		2									A + B	POLYSPHONDYLIUM PALLIDUM	PROTIST: AMOEBOZOA	PROTIST
Mh_Contig1481:10006..11247		5	DUF1768								A + B	STAPHYLOCOCCUS PHAGE K	VIRUS: PHAGE	BACTERIA
Mh_Contig222:75571..76264		2	Mac, Hexapep						NodL		A + B	ROSEOBACTER LITORALIS, ROSEOBACTER DENITRIFICANS, CITREICELLA SP, ROSEOVARIUS SP, RUEGERIA SP	BACTERIA: Rhodobacterales (Alphaproteobacteria)	BACTERIA
Mh_Contig2450:6416..9224		8									A + B	METHANOPYRUS KANDLERI	ARCHAEA: METHANOPYRI	ARCHAEA
Mh_Contig2499:3012..6351		9	Beta_elim_lyase	cellular amino acid metabolic process		lyase activity	catalytic activity		L-threonine aldolase		A + B	PSEUDOVIBRIO SP, LABRENZIA AGGREGATA, LABRENZIA ALEXANDRII	BACTERIA: Rhodobacterales (Alphaproteobacteria)	BACTERIA
Mh_Contig2789:1070..3530		5	Pkinase	protein amino acid phosphorylation	protein modification proces	ATP binding, protein kinase activity	protein kinase activity | nucleotide binding				A + B	TETRAHYMENA THERMOPHILA	PROTIST: CILIOPHORA	PROTIST
Mh_Contig2898:574..1741		3	COesterase								A + B	TRICHOMONAS VAGINALIS	PROTIST: TRICHOMONADIDA	PROTIST
Minc01316		1									A + B	PLASMODIUM FALCIPARUM	PROTIST: APICOMPLEXA	PROTIST
Minc01615		1									A + B	PROCHLOROCOCCUS MARINUS, DICKEYA DADANTII, PLASMODIUM BERGHEI	BACTERIA: CYANOBACTERIA, GAMMAPROTEOBACTERIA | PROTIST: APICOMPLEXA	BACTERIA | PROTIST
Minc01946		9				electron carrier activity, iron-sulfur cluster binding					A + B	ENTAMOEBA HISTOLYTICA	PROTIST: AMOEBOZOA	PROTIST
Minc02905		3	PMI_typeI	carbohydrate metabolic process	carbohydrate metabolic process	mannose-6-phosphate isomerase activity, zinc ion binding	catalytic activity				A + B	CHLAMYDOMONAS REINHARDTII	VIRIDIPLANTAE: CHLOROPHYTA	PLANT
Minc03345		3									A + B	STREPTOCOCCUS AGALACTIAE	BACTERIA: FIRMICUTES	BACTERIA
Minc04989		6	zf-CCCH			nucleic acid binding, zinc ion binding					A + B	PHYTOPHTHORA INFESTANS	PROTIST: OOMYCETE	PROTIST
Minc06015		8	Cyanate_lyase	cyanate metabolic process		cyanate hydratase activity	catalytic activity		Cyanate Lyase	Detoxification / Modulation of plant defense ?	A + B	METHYLACIDIPHILUM INFERNORUM	BACTERIA: VERRUCOMICROBIA	BACTERIA
Minc07982a		3									A + B	TOXOPLASMA GONDII	PROTIST: APICOMPLEXA	PROTIST
Minc09512		5	Radical_SAM			catalytic activity, iron-sulfur cluster binding	catalytic activity		Vitamin B7, biotin BioB		A + B	NEORICKETTSIA RISTICII, NEORICKETTSIA SENNETSU	BACTERIA: ALPHAPROTEOBACTERIA	BACTERIA
Minc09513		3	BATS	cofactor metabolic process		iron-sulfur cluster binding			Vitamin B7, biotin BioB		A + B	RICKETTSIA FELIS, RICKETTSIA ENDOSYMBIONT OF IXODES SCAPULARIS	BACTERIA: ALPHAPROTEOBACTERIA	BACTERIA
Minc10639	Y	5	Glyco_hydro_43	carbohydrate metabolic process	carbohydrate metabolic process	hydrolase activity, hydrolyzing O-glycosyl compounds	hydrolase activity		GH43 candidate arabinase	Arabinan, arabinose	A + B	COPRINOPSIS CINEREA, VERTICILLIUM ALBO-ATRUM, GIBBERELLA ZEAE, NECTRIA HAEMATOCOCCA, CHAETOMIUM GLOBOSUM, STREPTOMYCES COELICOLOR, STREPTOMYCES GRISEOFLAVUS, STREPTOMYCES SVICEUS, STREPTOMYCES GHANAENSIS, STREPTOMYCES FLAVOGRISEUS, STREPTOMYCES HYGROSCOPICUS, THERMOMONOSPORA CURVATA, NOCARDIOPSIS DASSONVILLEI, MICROMONOSPORA AURANTIACA, ACTINOSYNNEMA MIRUM	FUNGI: DIKARYA | BACTERIA: ACTINOMYCETALES	BACTERIA + FUNGI
Minc11235		6	DUF889								A + B	ORYZA SATIVA JAPONICA	VIRIDIPLANTAE: STREPTOPHYTA	PLANT
Minc11846	Y	5	Glyco_hydro_2_C	carbohydrate metabolic process	carbohydrate metabolic process	hydrolase activity, hydrolyzing O-glycosyl compounds	hydrolase activity		GH*_gha		A + B	AROMATOLEUM AROMATICUM	BACTERIA: BETAPROTEOBACTERIA	BACTERIA
Minc11909		2	OTCace	cellular amino acid metabolic process		amino acid binding, carboxyl- or carbamoyltransferase activity					A + B	BABESIA BOVIS, THEILERIA ANNULATA, THEILERIA PARVA	PROTIST: APICOMPLEXA	PROTIST
Minc14782	Y	3	DUF1772								A + B	METHYLOBACTERIUM NODULANS, METHYLOBACTERIUM POPULI, SINORHIZOBIUM MELILOTI, SINORHIZOBIUM MEDICAE, RHIZOBIUM SP, HYPHOMICROBIUM DENITRIFICANS, METHYLOBACTERIUM EXTORQUENS, METHYLOBACTERIUM EXTORQUENS, METHYLOBACTERIUM CHLOROMETHANICUM, METHYLOBACTERIUM EXTORQUENS, XANTHOBACTER AUTOTROPHICUS, AZORHIZOBIUM CAULINODANS, DESULFOVIBRIO MAGNETICUS, DESULFOVIBRIO SP	BACTERIA: RHIZOBIALES, DELTAPROTEOBACTERIA	BACTERIA
Minc15197		6	WD40								A + B	PHYSCOMITRELLA PATENS, PICEA SITCHENSIS, DICTYOSTELIUM DISCOIDEUM, THEILERIA ANNULATA, THEILERIA PARVA, USTILAGO MAYDIS	PROTIST: AMOEBOZOA, APICOMPLEXA | FUNGI: BASIDIOMYCOTA | VIRIDIPLANTAE: EMBRYOPHITA	PROTIST | FUNGI | PLANT
Minc16424		3							Concanavalin A-like lectin/glucanase;		A + B	BURKHOLDERIA CENOCEPACIA, BURKHOLDERIA CENOCEPACIA, RALSTONIA SOLANACEARUM, BURKHOLDERIA AMBIFARIA, BURKHOLDERIA UBONENSIS, BURKHOLDERIA AMBIFARIA, BURKHOLDERIA SP, AGROBACTERIUM RADIOBACTER, VARIOVORAX PARADOXUS	BACTERIA: BURKHOLDERIALES (BETAPROTEOBACTERIA), RHIZOBIALES (ALPHAPROTEOBACTERIA)	BACTERIA
Minc18140		5	Epimerase	cellular metabolic process		catalytic activity, coenzyme binding	catalytic activity				A + B	ARABIDOPSIS THALIANA	VIRIDIPLANTAE: STREPTOPHYTA	PLANT
Minc18407		2	CoaE	coenzyme A biosynthetic process		ATP binding, dephospho-CoA kinase activity	nucleotide binding				A + B	CLOSTRIDIUM METHYLPENTOSUM, SEBALDELLA TERMITIDIS, LEPTOTRICHIA BUCCALIS, LEPTOTRICHIA HOFSTADII, CATENIBACTERIUM MITSUOKAI	BACTERIA: FIRMICUTES, FUSOBACTERIA	BACTERIA
Minc04192a		6									A + B	RHIZOBIUM LEGUMINOSARUM, RHIZOBIUM ETLI, AGROBACTERIUM RADIOBACTER, AGROBACTERIUM VITIS, AGROBACTERIUM TUMEFACIENS, SINORHIZOBIUM MELILOTI, SINORHIZOBIUM MEDICAE, RHIZOBIUM SP, HOEFLEA PHOTOTROPHICA, CHELATIVORANS, MESORHIZOBIUM LOTI, MESORHIZOBIUM OPPORTUNISTUM, OCHROBACTRUM INTERMEDIUM, BRUCELLA MELITENSIS, BRUCELLA CETI, BRUCELLA SP, BRUCELLA SUIS, BRUCELLA MELITENSIS, BRUCELLA OVIS, BRUCELLA …	BACTERIA: RHIZOBIALES	BACTERIA
Minc07726		2									A + B	OPITUTACEAE BACTERIUM	BACTERIA: VERRUCOMICROBIA	BACTERIA
Minc14977		2	RF-1	translational termination		translation release factor activity					A + B	BRADYRHIZOBIUM SP	BACTERIA: ALPHAPROTEOBACTERIA	BACTERIA
Mh_Contig1886:4771..7593	Y	7	Glyco_hydro_28	carbohydrate metabolic process	carbohydrate metabolic process	polygalacturonase activity	hydrolase activity		GH28 polygalacturonase	pectin; polygalacturonan	A + B	THERMOANAEROBACTERIUM, THERMOSULFURIGENES YERSINIA, FREDERIKSENII, YERSINIA ENTEROCOLITICA, YERSINIA BERCOVIERI, YERSINIA MOLLARETII, YERSINIA INTERMEDIA, ERWINIA CHRYSANTHEMI, DICKEYA ZEAE, DICKEYA DADANTII, DICKEYA DADANTII, RALSTONIA SOLANACEARUM, RALSTONIA SOLANACEARUM, PSEUDOMONAS PUTIDA, PSEUDOMONAS FLUORESCENS, PECTOBACTERIUM CAROTOVORUM, PECTOBACTERIUM CAROTOVORUM, AROTOVORUM, PECTOBACTER…	BACTERIA: FIRMICUTES, GAMMAPROTEOBACTERIA, BETAPROTEOBACTERIA	BACTERIA
Minc02701		6	UDPGT	metabolic process		transferase activity, transferring hexosyl groups			GT*_GT1	Detoxification / Modulation of plant defense ?	A + B	CLOSTRIDIUM CELLULOVORANS, BACILLUS THURINGIENSIS, BACILLUS CEREUS, BACILLUS THURINGIENSIS, BACILLUS CEREUS, BACILLUS WEIHENSTEPHANENSIS, BACILLUS MYCOIDES, BACILLUS PSEUDOMYCOIDES, BACILLUS CYTOTOXICUS	BACTERIA: FIRMICUTES	BACTERIA
Minc09678b		2									A + B	OCHROBACTRUM INTERMEDIUM, OCHROBACTRUM ANTHROPI, BRUCELLA CETI, BRUCELLA ABORTUS, BRUCELLA SUIS, BRUCELLA SP, BRUCELLA OVIS, BRUCELLA ABORTUS, BRUCELLA MELITENSIS	BACTERIA: ALPHAPROTEOBACTERIA (BRUCELLACEAE)	BACTERIA
Minc14296		2	DUF1772								A + B	DESULFOVIBRIO MAGNETICUS, DESULFOVIBRIO SP, HYPHOMICROBIUM DENITRIFICANS, AZORHIZOBIUM CAULINODANS, XANTHOBACTER AUTOTROPHICUS, METHYLOBACTERIUM NODULANS, METHYLOBACTERIUM EXTORQUEN, METHYLOBACTERIUM CHLOROMETHANICUM, METHYLOBACTERIUM POPULI, SINORHIZOBIUM MEDICAE, SINORHIZOBIUM MELILOTI, RHIZOBIUM SP	BACTERIA: RHIZOBIALES, DELTAPROTEOBACTERIA	BACTERIA
Minc14603		3	Vitamin B5- Pantoate_ligase	pantothenate biosynthetic process		pantoate-beta-alanine ligase activity	catalytic activity		Vitamin B5 pantothenate		A + B	ARCOBACTER BUTZLERI, NAUTILIA PROFUNDICOLA, CAMINIBACTER MEDIATLANTICUS	BACTERIA: EPSILONPROTEOBACTERIA	BACTERIA
Minc14982		6	Pantoate_transf	pantothenate biosynthetic process		3-methyl-2-oxobutanoate hydroxymethyltransferase activity			Pyruvate/Phosphoenolpyruvate kinase, catalytic core		A + B	MAGNETOCOCCUS SP, SYNECHOCOCCUS SP, LYNGBYA SP, MICROCOLEUS CHTHONOPLASTES, CYANOTHECE SP, RICHODESMIUM ERYTHRAEUM, GLOEOBACTER VIOLACEUS, HALIANGIUM OCHRACEUM, MYXOCOCCUS XANTHUS, ANAEROMYXOBACTER SP, PELOBACTER PROPIONICUS, GEOBACTER LOVLEYI, GEOBACTER SULFURREDUCENS, GEOBACTER METALLIREDUCENS, GEOBACTER BEMIDJIENSIS, GEOBACTER SP, DESULFUROMONAS ACETOXIDANS, DESULFATIBACILLUM ALKENIVORANS, THE…	BACTERIA: CYANOBACTERIA, PROTEOBACTERIA, AQUIFACE, FIRMICUTES, NITROSPIRAE	BACTERIA
Minc18566		1									A + B	ORYZA SATIVA INDICA GROUP, SORGHUM BICOLOR, PHYLLOSTACHYS EDULIS	VIRIDIPLANTAE: POACEA	PLANT
Minc10892		4							GH*_gha		A + B	XANTHOBACTER AUTOTROPHICUS, AZORHIZOBIUM CAULINODANS	BACTERIA: RHIZOBIALES (ALPHAPROTEOBACTERIA)	BACTERIA
Mh_Contig280:9882..11674	Y	6							GH*_Gha, candidate b-glycosidase		A + B	AZORHIZOBIUM CAULINODANS, XANTHOBACTER AUTOTROPHICUS	BACTERIA: RHIZOBIALES (ALPHAPROTEOBACTERIA)	BACTERIA
Minc10889	Y	3							GH*_gha		A + B	XANTHOBACTER AUTOTROPHICUS, AZORHIZOBIUM CAULINODANS	BACTERIA: RHIZOBIALES (ALPHAPROTEOBACTERIA)	BACTERIA
Mh_Contig1342:1068..1343		1									A + B	PARAMECIUM TETRAURELIA, POLYSPHONDYLIUM PALLIDUM, MONOSIGA BREVICOLLIS	PROTIST: MONOSIGA, AMOEBOZOA, CILIOPHORA	PROTIST
Mh_Contig2083:3453..4301		4	CYTH	cAMP biosynthetic process		adenylate cyclase activity	catalytic activity				A + B	THERMOCOCCUS GAMMATOLERANS	ARCHAEA: THERMOCOCCI	ARCHAEA
Mh_Contig280:68002..69512	Y	4	Pkinase	protein amino acid phosphorylation	protein modification process	ATP binding, protein kinase activity	protein kinase activity | nucleotide binding				A + B	PICHIA PASTORIS	FUNGI: DIKARYA	FUNGI
Minc02580		1									A + B	CYANOTHECE SP	BACTERIA: CYANOBACTERIA	BACTERIA
Minc09268		3									A + B	PLANCTOMYCES MARIS, PSEUDOMONAS SYRINGAE	BACTERIA: PLANCTOMYCETES, GAMMAPROTEOBACTERIA	BACTERIA
Minc10191		4									A + B	PARAMECIUM TETRAURELIA	PROTIST: CILIOPHORA	PROTIST
Minc15221		12									A + B	BACILLUS CEREUS, BACILLUS THURINGIENSIS, BACILLUS CEREUS, ALKALIPHILUS METALLIREDIGENS, BACILLUS LICHENIFORMIS, CLOSTRIDIUM BEIJERINCKII, BACILLUS CLAUSII, BACILLUS CEREUS, BACILLUS THURINGIENSIS	BACTERIA: FIRMICUTES	BACTERIA
Minc00365	Y	2									A	LEISHMANIA MAJOR, CRYPTOSPORIDIUM PARVUM, CRYPTOSPORIDIUM HOMINIS	PROTIST: APICOMPLEXA, KINETOPLASTIDA	PROTIST
Mh_Contig135:12433..14112		5	PGAM (Phosphoglycerate mutase family)								A	DESULFOVIBRIO DESULFURICANS	BACTERIA: DELTAPROTEOBACTERIA	BACTERIA
Mh_Contig1358:39..3354		9	Glyco_hydro_32N						GH32 invertase	Sucrose	A	RHIZOBIUM ETLI, RHIZOBIUM SP, RHIZOBIUM LEGUMINOSARUM, AGROBACTERIUM TUMEFACIENS	BACTERIA: RHIZOBIUM / AGROBACTERIUM	BACTERIA
Mh_Contig170:31707..33369		6	Lipin_N								A	PLASMODIUM FALCIPARUM	PROTIST: APICOMPLEXA	PROTIST
Mh_Contig293:21730..23424		5									A	KLUYVEROMYCES LACTIS	FUNGI: DIKARYA	FUNGI
Mh_Contig364:2402..4508		4	zf-C3HC4								A	TETRAHYMENA THERMOPHILA	PROTIST: CILIOPHORA	PROTIST
Mh_Contig392:33512..34604		3	Pkinase	protein amino acid phosphorylation	protein modification process	ATP binding, protein kinase activity	protein kinase activity | nucleotide binding				A	PARAMECIUM TETRAURELIA	PROTIST: CILIOPHORA	PROTIST
Mh_Contig611:21797..23320		6	HSP70								A	VESICOMYA SP MT-I SYMBIONT, VESICOMYA CORDATA GILL SYMBIONT, VESICOMYA SP MT-III SYMBIONT	BACTERIA: GAMMAPROTEOBACTERIA	BACTERIA
Minc00968		1	RVP							Retroviral aspartyl protease	A	DICTYOSTELIUM DISCOIDEUM	PROTIST: AMOEBOZOA	PROTIST
Minc01278	Y	3									A	RICKETTSIA FELIS	BACTERIA: ALPHAPROTEOBACTERIA	BACTERIA
Minc07328		3	Lon_C	proteolysis	protein metabolic process	ATP-dependent peptidase activity, serine-type endopeptidase activity	peptidase activity				A	MEIOTHERMUS RUBER, ANAEROMYXOBACTER SP, SORANGIUM CELLULOSUM, PELOBACTER PROPIONICUS, GEOBACTER BEMIDJIENSIS, GEOBACTER SP, VULARCULA BERMUDENSIS, RUMINOCOCCUS OBEUM, EUBACTERIUM RECTALE, CLOSTRIDIUM HATHEWAYI, CLOSTRIDIALES BACTERIUM, CLOSTRIDIUM BOLTEAE, LEPTOSPIRILLUM SP, LEPTOSPIRILLUM RUBARUM, MYCOPLASMA CONJUNCTIVAE, PAENIBACILLUS SP	BACTERIA: FIRMICUTES, NITROSPIRAE, TENERICUTES, DEINOCOCCI, DELTAPROTEOBACTERIA	BACTERIA
Minc10330		3	DUF1768								A	STAPHYLOCOCCUS PHAGE K, CLOSTRIDIUM BEIJERINCKII, CLOSTRIDIUM BOTULINUM, CLOSTRIDIUM PERFRINGENS, PROVIDENCIA RETTGERI, NAEGLERIA GRUBERI, MICROMONOSPORA AURANTIACA, BREVIBACILLUS BREVIS, FAECALIBACTERIUM PRAUSNITZII, BACTEROIDES CAPILLOSUS	PROTIST: HETEROLOBOSEA | BACTERIA: FIRMICUTES, GAMMAPROTEOBACTERIA, ACTINOBACTERIA | VIRUS: PHAGE	BACTERIA | PROTIST
Minc13314		6	DAO			oxidoreductase activity	catalytic activity				A	PHYTOPHTHORA INFESTANS	PROTIST: OOMYCETE	PROTIST
Minc14976		1	GTP_EFTU			GTP binding, GTPase activity	nucleotide binding | hydrolase activity				A	PLASMODIUM KNOWLESI	PROTIST: APICOMPLEXA	PROTIST
Minc17772		4	Chitosanase						GH75_dist	Chitosan	A	STREPTOMYCES SP, CATENULISPORA ACIDIPHILA	BACTERIA: ACTINOBACTERIA	BACTERIA
Mh_Contig1353:17897..19181		3	Pkinase	protein amino acid phosphorylation	protein modification process	ATP binding, protein kinase activity	protein kinase activity | nucleotide binding				A	PARAMECIUM TETRAURELIA	PROTIST: CILIOPHORA	PROTIST
Mh_Contig1429:11169..12646		6									A	MYCOPLASMA CAPRICOLUM	BACTERIA: TENERICUTES	BACTERIA
Mh_Contig1483:5311..5864		3	DUF1768								A	FIBROBACTER SUCCINOGENES, STAPHYLOCOCCUS PHAGE K	BACTERIA: FIBROBACTERES | VIRUS: PHAGE	BACTERIA
Mh_Contig1494:30234..31181		5	PIG-F	GPI anchor biosynthetic process	protein modification process			endoplasmic reticulum membrane, integral to membrane			A	LODDEROMYCES ELONGISPORUS	FUNGI: DIKARYA	FUNGI
Mh_Contig1558:7790..8628		3	Glyco_hydro_43	carbohydrate metabolic process	carbohydrate metabolic process	hydrolase activity, hydrolyzing O-glycosyl compounds	hydrolase activity		GH43 candidate arabinase	Arabinan, arabinose	A	TALAROMYCES STIPITATUS, PENICILLIUM MARNEFFEI, ASPERGILLUS FUMIGATUS, ASPERGILLUS FLAVUS, SCLEROTINIA SCLEROTIORUM, BOTRYOTINIA FUCKELIANA, CHAETOMIUM GLOBOSUM, ASPERGILLUS ACULEATUS, PYRENOPHORA TRITICI-REPENTIS, PHAEOSPHAERIA NODORUM, NECTRIA HAEMATOCOCCA, ASPERGILLUS CLAVATUS, ASPERGILLUS ORYZAE, PENICILLIUM CHRYSOGENUM, ASPERGILLUS NIDULANS, NEOSARTORYA FISCHERI, ASPERGILLUS FUMIGATUS, ASPERG…	FUNGI: DIKARYA	FUNGI
Mh_Contig158:18359..22029		5	Pkinase	protein amino acid phosphorylation	protein modification process	ATP binding, protein kinase activity	protein kinase activity | nucleotide binding				A	THALASSIOSIRA PSEUDONANA, PARAMECIUM TETRAURELIA, SORGHUM BICOLOR	PROTIST: CILIOPHORA, STRAMENOPILES | VIRIDIPLANTAE: STREPTOPHYTA	PROTIST | PLANT
Mh_Contig1647:12873..14508	Y	6									A	EUBACTERIUM VENTRIOSUM, PAENIBACILLUS SP	BACTERIA: FIRMICUTES	BACTERIA
Mh_Contig180:4847..5405		2									A	MYCOBACTERIUM MARINUM, PENICILLIUM MARNEFFEI	BACTERIA: ACTINOBACTERIA | FUNGI: DIKARYA	BACTERIA | FUNGI
Mh_Contig1856:1160..2712		7									A	TRICHOMONAS VAGINALIS	PROTIST: TRICHOMONADIDA	PROTIST
Mh_Contig1879:4116..5961		4	Glyco_hydro_25	cell wall macromolecule catabolic process, peptidoglycan catabolic process	carbohydrate metabolic process	lysozyme activity	hydrolase activity		GH25		A	RICKETTSIELLA GRYLLI, PSEUDOMONAS SYRINGAE , XANTHOMONAS ALBILINEANS, XYLELLA FASTIDIOSA, WOLBACHIA ENDOSYMBIONT OF CULEX QUINQUEFASCIATUS, FRANKIA SP, NOSTOC PUNCTIFORME, ARTHROSPIRA MAXIMA, ARTHROSPIRA PLATENSIS, PARACA LYNGBYA, SPIROSOMA LINGUALE, ESCHERICHIA COLI, SHIGELLA FLEXNERI, SHIGELLA DYSENTERIAE, KORDIA ALGICIDA, MARINOMONAS SP	BACTERIA: PROTEOBACTERIA, CYANOBACTERIA, ACTINOBACTERIA, BACTEROIDETES	BACTERIA
Mh_Contig1905:330..998	Y	3	DPBB_1								A	STREPTOMYCES LAVENDULAE, ACTINOSYNNEMA MIRUM, POLYSPHONDYLIUM PALLIDUM, AMYCOLATOPSIS MEDITERRANEI	BACTERIA: ACTINOBACTERIA | PROTIST: AMOEBOZOA	BACTERIA + PROTIST
Mh_Contig2102:3683..4866		4									A	SULFOLOBUS TOKODAII, SULFOLOBUS ISLANDICUS, SULFOLOBUS SOLFATARICUS	ARCHEAE: THERMOPROTEI	ARCHAEA
Mh_Contig223:33854..34905		5	Glycos_transf_1	biosynthetic process					GT4		A	METHYLOCELLA SILVESTRIS, METHYLOBACTERIUM RADIOTOLERANS, METHYLOBACTERIUM EXTORQUENS, METHYLOBACTERIUM POPULI, METHYLOBACTERIUM SP, METHYLOBACTERIUM NODULANS, CHELATIVORANS SP, RALSTONIA EUTROPHA, NITROBACTER WINOGRADSKYI, RHIZOBIUM LEGUMINOSARUM, RHIZOBIUM ETLI, RHIZOBIUM LEGUMINOSARUM, RHIZOBIUM SP, MESORHIZOBIUM OPPORTUNISTUM, SPHINGOMONAS SP, ERYTHROBACTER SP, RHODOMICROBIUM VANNIELII, CUPRIA…	BACTERIA: ALPHAPROTEOBACTERIA, BETAPROTEOBACTERIA, GAMMAPROTEOBACTERIA, DELTAPROTEOBACTERIA, CYANOBACTERIA, VERRUCOMICROBIA	BACTERIA
Mh_Contig2254:3657..5652		11	LRR_1			protein binding					A	ENTAMOEBA HISTOLYTICA	PROTIST: AMOEBOZOA	PROTIST
Mh_Contig2271:10462..11039	Y	2	Dimer_Tnp_hAT			protein dimerization activity					A	POLYSPHONDYLIUM PALLIDUM, ORYZA SATIVA JAPONICA, VIBRIO CHOLERAE	PROTIST: AMOEBOZOA | VIRIDIPLANTAE: STREPTOPHYTA | BACTERIA: GAMMAPROTEOBACTERIA	BACTERIA | PROTIST | PLANT
Mh_Contig239:30337..30933		2									A	ASPERGILLUS ORYZAE, ASPERGILLUS FLAVUS	FUNGI: DIKARYA	FUNGI
Mh_Contig2575:2849..3583	Y	3	CM_2	chorismate metabolic process					Chorismate mutase		A	PECTOBACTERIUM CAROTOVORUM, SHEWANELLA WOODYI, LABRENZIA AGGREGATA	BACTERIA: GAMMAPROTEOBACTERIA, ALPHAPROTEOBACTERIA	BACTERIA
Mh_Contig2730:2805..5956		7	Lon_C	proteolysis	protein metabolic process	ATP-dependent peptidase activity, serine-type endopeptidase activity	peptidase activity				A	RICKETTSIA FELIS, MARINOMONAS SP, LEPTOSPIRA INTERROGANS, LEPTOSPIRA INTERROGANS, CANDIDATUS KORIBACTER, VERSATILIS ELLIN, ACIDOBACTERIUM CAPSULATUM, MOORELLA THERMOACETICA, CHRYSEOBACTERIUM GLEUM, BACTEROIDES SP, BACTEROIDES FRAGILIS, BACTEROIDES EGGERTHII, BACTEROIDES STERCORIS, BACTEROIDES UNIFORMIS, BACTEROIDES COPROCOLA, BACTEROIDES PLEBEIUS, FLAVOBACTERIA BACTERIUM, FLAVOBACTERIUM PSYCHROPH…	BACTERIA: ACIDOBACTERIA, PROTEOBACTERIA, BACTEROIDETES, SPIROCHAETES, FIRMICUTES	BACTERIA
Mh_Contig3141:1200..2289		4									A	TRICHOMONAS VAGINALIS, CHLOROBIUM LIMICOLA, CHLOROBIUM PHAEOBACTEROIDES	PROTIST: TRICHOMONADIDA | BACTERIA: CHLOROBIA	BACTERIA | PROTIST
Mh_Contig462:8264..8510		2	Na_sulph_symp	sodium ion transport,transmembrane transport		transporter activity		membrane			A	GAMMA PROTEOBACTERIUM, GRAMELLA FORSETII, PSYCHROFLEXUS TORQUIS	BACTERIA: BACTEROIDETES, GAMMAPROTEOBACTERIA	BACTERIA
Mh_Contig498:37206..40167	Y	7	Pkinase	protein amino acid phosphorylation	protein modification process	ATP binding,protein kinase activity	protein kinase activity | nucleotide binding				A	NAEGLERIA GRUBERI	PROTIST: HETEROLOBOSEA	PROTIST
Mh_Contig790:11104..12567	Y	5	DPBB_1								A	ACTINOSYNNEMA MIRUM, CRYPTOCOCCUS NEOFORMANS	BACTERIA: ACTINOBACTERIA | FUNGI: DIKARYA	BACTERIA | FUNGI
Mh_Contig820:5007..8235		7	Aldedh	metabolic process, oxidation reduction		oxidoreductase activity	catalytic activity				A	PROCHLOROCOCCUS MARINUS	BACTERIA: CYANOBACTERIA	BACTERIA
Minc00058		2	zf-CCHC			nucleic acid binding,zinc ion binding					A	TETRAHYMENA THERMOPHILA	PROTIST: CILIOPHORA	PROTIST
Minc00379	Y	2	Pectate_lyase			pectate lyase activity	catalytic activity	extracellular region	PL3 pectate lyase	Pectin	A	FRANKIA SP, STREPTOMYCES HYGROSCOPICUS, STREPTOMYCES VIRIDOCHROMOGENES, STREPTOMYCES GHANAENSIS, STREPTOMYCES, GRISEOFLAVUS, STREPTOMYCES SCABIEI	BACTERIA: ACTINOMYCETALES	BACTERIA
Minc00665		5	G-alpha	G-protein coupled receptor protein signaling pathway		guanyl nucleotide binding, signal transducer activity	nucleotide binding				A	SCLEROTINIA SCLEROTIORUM, SCLEROTINIA SCLEROTIORUM, BOTRYOTINIA FUCKELIANA, BOTRYOTINIA FUCKELIANA, MYCOSPHAERELLA GRAMINICOLA, MICROSPORUM CANIS, UNCINOCARPUS REESII, COCCIDIOIDES IMMITIS, ASPERGILLUS NIDULANS, ASPERGILLUS NIGER, TALAROMYCES STIPITATUS, PENICILLIUM MARNEFFEI, AJELLOMYCES DERMATITIDIS, PARACOCCIDIOIDES BRASILIENSIS, AJELLOMYCES CAPSULATUS, VERTICILLIUM ALBO-ATRUM, MONILIOPHTHORA …	FUNGI: DIKARYA	FUNGI
Minc00808		6									A	VITIS VINIFERA	VIRIDIPLANTAE: STREPTOPHYTA	PLANT
Minc00928	Y	7	UPF57					integral to membrane			A	PODOSPORA ANSERINA	FUNGI: DIKARYA	FUNGI
Minc02319		3									A	CHLAMYDOMONAS REINHARDTII	VIRIDIPLANTAE: CHLOROPHYTA	PLANT
Minc02328a		7									A	CHLAMYDOMONAS REINHARDTII	VIRIDIPLANTAE: CHLOROPHYTA	PLANT
Minc02473	Y	3	DnaJ			heat shock protein binding					A	DICTYOSTELIUM DISCOIDEUM, TETRAHYMENA THERMOPHILA	PROTIST: AMOEBOZOA, CILIOPHORA	PROTIST
Minc02581	Y	8									A	PARAMECIUM TETRAURELIA, ARABIDOPSIS THALIANA	PROTIST: CILIOPHORA | VIRIDIPLANTAE: STREPTOPHYTA	PROTIST | PLANT
Minc03761		5									A	TETRAHYMENA THERMOPHILA, PICEA SITCHENSIS	PROTIST: CILIOPHORA | VIRIDIPLANTAE: STREPTOPHYTA	PROTIST | PLANT
Minc04115		5									A	NEUROSPORA CRASSA, TALAROMYCES STIPITATUS, PENICILLIUM MARNEFFEI, ASPERGILLUS TERREUS, ASPERGILLUS ORYZAE, ASPERGILLUS FLAVUS, NEOSARTORYA FISCHERI, ASPERGILLUS CLAVATUS, ASPERGILLUS NIDULANS, UNCINOCARPUS REESII, COCCIDIOIDES IMMITIS, COCCIDIOIDES POSADASII, DELTA SOWGP	FUNGI: DIKARYA	FUNGI
Minc04352		3	BPL_LplA_LipB	protein modification process	protein modification process	catalytic activity	catalytic activity				A	SCHIZOSACCHAROMYCES POMBE	FUNGI: DIKARYA	FUNGI
Minc04880		3	zf-CCHC			nucleic acid binding, zinc ion binding					A	TRYPANOSOMA CRUZI, LEISHMANIA INFANTUM, LEISHMANIA MAJOR	PROTIST: TRYPANOSOMATIDAE	PROTIST
Minc05401		5									A	TRICHOMONAS VAGINALIS	PROTIST: TRICHOMONADIDA	PROTIST
Minc06923		3	SPRY								A	ENTAMOEBA DISPAR, ENTAMOEBA HISTOLYTICA	PROTIST: AMOEBOZOA	PROTIST
Minc07485	Y	2	Sugar_tr	transmembrane transport, transport		transporter activity		integral to membrane			A	PHYTOPHTHORA INFESTANS	PROTIST: OOMYCETE	PROTIST
Minc07826b		4	Radical_SAM			catalytic activity, iron-sulfur cluster binding	catalytic activity				A	PICHIA PASTORIS, OSTREOCOCCUS LUCIMARINUS, OSTREOCOCCUS TAURI	VIRIDIPLANTAE: CHLOROPHYTA | FUNGI: DIKARYA	PLANT | FUNGI
Minc08077		9	Gln-synt_C	nitrogen compound metabolic process		glutamate-ammonia ligase activity	catalytic activity		Glutamine synthetase GSI		A	FRANKIA SP, FRANKIA ALNI, LEGIONELLA PNEUMOPHILA, LEGIONELLA PNEUMOPHILA, LEGIONELLA PNEUMOPHILA, MORITELLA SP, SHEWANELLA SEDIMINIS, MARINOMONAS SP, MARINE GAMMA PROTEOBACTERIUM, JANIBACTER SP, BREVIBACTERIUM LINENS, PSEUDOMONAS SP, PSEUDOMONAS AERUGINOSA, KINEOCOCCUS RADIOTOLERANS, MYCOBACTERIUM GILVUM, MYCOBACTERIUM SP, NOCARDIOIDES SP, MYCOBACTERIUM TUBERCULOSIS, STREPTOMYCES SP, STREPTOMYCES…	BACTERIA: PROTEOBACTERIA, FIRMICUTES, ACTINOBACTERIA, CFB GROUP BACTERIA, GNS BACTERIA, HIGH GC GRAM+ | VIRIDIPLANTAE: STREPTOPHYTA	BACTERIA | PLANT
Minc08144		6	UCH	ubiquitin-dependent protein catabolic process	protein metabolic process	ubiquitin thiolesterase activity	hydrolase activity				A	PHYTOPHTHORA INFESTANS, YARROWIA LIPOLYTICA	PROTIST: OOMYCETE | FUNGI: DIKARYA	PROTIST | FUNGI
Minc08671		3	RLI, DUF367								A	TRICHOPLAX ADHAERENS	PLACOZOA	PLACOZOA
Minc09010		5	PfkB								A	TOXOPLASMA GONDII	PROTIST: APICOMPLEXA	PROTIST
Minc09221		5	HSP7								A	DEBARYOMYCES HANSENII	FUNGI: DIKARYA	FUNGI
Minc09970		4	Pkinase	protein amino acid phosphorylation	protein modification process	ATP binding, protein kinase activity	protein kinase activity | nucleotide binding				A	PARAMECIUM TETRAURELIA	PROTIST: CILIOPHORA	PROTIST
Minc10536	Y	3							Chorismate Mutase		A	VARIOVORAX PARADOXUS, STREPTOMYCES SVICEUS, STREPTOMYCES SCABIEI, STREPTOMYCES SP, XANTHOMONAS CAMPESTRIS, BURKHOLDERIA PHYMATUM, BURKHOLDERIA XENOVORANS, BURKHOLDERIA SP, BURKHOLDERIA PHYTOFIRMANS, BURKHOLDERIA GRAMINIS, BURKHOLDERIA OKLAHOMENSIS, BURKHOLDERIA THAILANDENSIS, BURKHOLDERIA PSEUDOMALLEI, BURKHOLDERIA MALLEI, BURKHOLDERIA PSEUDOMALLEI, BURKHOLDERIA UBONENSIS, BURKHOLDERIA MULTIVORAN…	BACTERIA: BETAPROTEOBACTERIA	BACTERIA
Minc10987	Y	2	DPBB_1						EXPN; MI01406	Plant cell wall	A	CANDIDA DUBLINIENSIS, CANDIDA ALBICANS, LACCARIA BICOLOR, ACTINOSYNNEMA MIRUM, AMYCOLATOPSIS MEDITERRANEI, STREPTOMYCES LAVENDULAE, POLYSPHONDYLIUM PALLIDUM, DICTYOSTELIUM DISCOIDEUM	BACTERIA: ACTINOBACTERIA | FUNGI: DIKARYA | PROTIST: AMOEBOZOA	BACTERIA | PROTIST | FUNGI
Minc11468	Y	4	DPBB_1						EXPN, Expansin-like protein	Plant cell wall	A	DICTYOSTELIUM DISCOIDEUM, AMYCOLATOPSIS MEDITERRANEI, POLYSPHONDYLIUM PALLIDUM, ACTINOSYNNEMA MIRUM, STREPTOMYCES LAVENDULAE	PROTIST: AMOEBOZOA | BACTERIA: ACTINOBACTERIA	BACTERIA | PROTIST
Minc12441		3									A	CHLAMYDOMONAS REINHARDTII, NECTRIA HAEMATOCOCCA, GLOMERELLA CINGULATA	VIRIDIPLANTAE: CHLOROPHYTA | FUNGI: DIKARYA	PLANT | FUNGI
Minc12831		1	Lon_C	proteolysis	protein metabolic process	ATP-dependent peptidase activity, serine-type endopeptidase activity	peptidase activity				A	THERMOTOGA MARITIMA, MARINITOGA PIEZOPHILA, THERMOTOGA PETROPHILA, THERMOTOGA SP, THERMOSIPHO MELANESIENSIS, GEOBACTER SULFURREDUCENS, GEOBACTER METALLIREDUCENS, THERMODESULFOVIBRIO YELLOWSTONII, CANDIDATUS KUENENIA, STUTTGARTIENSIS MYXOCOCCUS XANTHUS, VERRUCOMICROBIUM SPINOSUM, KOSMOTOGA OLEARIA, RUMINOCOCCUS TORQUES, ROSEBURIA INTESTINALIS, HALOTHERMOTHRIX ORENII, THERMOSINUS CARBOXYDIVORANS, A…	BACTERIA: PLANCTOMYCETES, BACTEROIDETES, FIRMICUTES, THERMOTOGALES, VERRUCOMICROBIA, DELTAPROTEOBACTERIA | FUNGI: DIKARYA	BACTERIA | FUNGI
Minc13286		8	Pkinase	protein amino acid phosphorylation	protein modification process	ATP binding, protein kinase activity	protein kinase activity | nucleotide binding				A	PLASMODIUM FALCIPARUM, THEILERIA ANNULATA	PROTIST: APICOMPLEXA, ALVEOLATA	PROTIST
Minc13297		7	Sugar_tr	transmembrane transport, transport		transporter activity		integral to membrane			A	KOCURIA RHIZOPHILA, ARTHROBACTER CHLOROPHENOLICUS, ARTHROBACTER SP, STREPTOMYCES HYGROSCOPICUS, STREPTOMYCES VIRIDOCHROMOGENES, SACCHAROPOLYSPORA ERYTHRAEA, BACILLUS SUBTILIS, BACILLUS SUBTILIS, BACILLUS COAGULANS, BACILLUS CEREUS, BACILLUS AMYLOLIQUEFACIENS, BACILLUS LICHENIFORMIS, LEIFSONIA XYLI, MITSUOKELLA MULTACIDA, LACTOBACILLUS PLANTARUM, OENOCOCCUS OENI, CLOSTRIDIUM BEIJERINCKII, LACTOBAC…	BACTERIA: FIRMICUTES, ACTINOMYCETALES	BACTERIA
Minc13404		6	Pkinase	protein amino acid phosphorylation	protein modification process	ATP binding, protein kinase activity	protein kinase activity | nucleotide binding				A	PARAMECIUM TETRAURELIA	PROTIST: CILIOPHORA	PROTIST
Minc13614	Y	6	Cellulase	carbohydrate metabolic process	carbohydrate metabolic process	hydrolase activity, hydrolyzing O-glycosyl compounds	hydrolase activity		GH5 cellulase	Cellulose	A	UNCULTURED SYMBIOTIC PROTIST OF CRYPTOCERCUS PUNCTULATUS	PROTIST: UNCULTURED	PROTIST
Minc13832		9									A	TRICHOMONAS VAGINALIS, MYCOPLASMA CAPRICOLUM, PETROTOGA MOBILIS	BACTERIA: THERMOTOGALES, TENERICUTES | PROTIST: TRICHOMONADIDA	BACTERIA | PROTIST
Minc14316		3	DUF1768								A	STAPHYLOCOCCUS PHAGE K, RUMINOCOCCUS SP, SHUTTLEWORTHIA SATELLES	BACTERIA: FIRMICUTES | VIRUS: BACTERIPHAGE K	BACTERIA
Minc14495		3	zf-C3HC4								A	TRYPANOSOMA BRUCEI	PROTIST: TRYPANOSOMATIDAE	PROTIST
Minc14599		5							EXPN, Expansin-like protein	Plant cell wall	A	STREPTOMYCES LAVENDULAE, POLYSPHONDYLIUM PALLIDUM, AMYCOLATOPSIS MEDITERRANEI, DICTYOSTELIUM DISCOIDEUM, CLAVISPORA LUSITANIAE, CANDIDA TROPICALIS, COPRINOPSIS CINEREA, LACCARIA BICOLOR, USTILAGO MAYDIS	BACTERIA: ACTINOBACTERIA | PROTIST: AMOEBOZOA | FUNGI: DIKARYA	BACTERIA | PROTIST | FUNGI
Minc14716	Y	13									A	VARIOVORAX PARADOXUS, AGROBACTERIUM RADIOBACTER, BURKHOLDERIA AMBIFARIA, BURKHOLDERIA SP, RALSTONIA SOLANACEARUM, BURKHOLDERIA UBONENSIS	BACTERIA: RHIZOBIALES, BURKHOLDERIALES	BACTERIA
Minc14967c		3									A	ENTAMOEBA DISPAR	PROTIST: AMOEBOZOA	PROTIST
Minc15863		9	Sugar_tr	transmembrane transport, transport		transporter activity		integral to membrane			A	MITSUOKELLA MULTACIDA, BACILLUS COAGULANS, LEIFSONIA XYLI, BACILLUS SUBTILIS, BACILLUS LICHENIFORMIS, BACILLUS AMYLOLIQUEFACIENS, BACILLUS CEREUS, STREPTOMYCES HYGROSCOPICUS, STREPTOMYCES VIRIDOCHROMOGENES, ARTHROBACTER CHLOROPHENOLICUS	BACTERIA: FIRMICUTES, ACTINOMYCETALES	BACTERIA
Minc16606		2									A	PHYTOPHTHORA INFESTANS	PROTIST: OOMYCETE	PROTIST
Minc16723		8	Pribosyltran	nucleoside metabolic process					phosphoribosyltransferase MI00109		A	CHELATIVORANS SP, BEIJERINCKIA INDICA, POLYSPHONDYLIUM PALLIDUM, DICTYOSTELIUM DISCOIDEUM, GEOBACTER URANIIREDUCENS, ALKALILIMNICOLA EHRLICHII MLHE-1, PSEUDOMONAS AERUGINOSA, NOVOSPHINGOBIUM AROMATICIVORANS, METHYLOCELLA SILVESTRIS, CAULOBACTER SP, ROSEOBACTER SP, PHENYLOBACTERIUM ZUCINEUM, RALSTONIA SOLANACEARUM, CUPRIAVIDUS METALLIDURANS, RALSTONIA EUTROPHA, CUPRIAVIDUS TAIWANENSIS, PARACOCCUS …	BACTERIA: BETAPROTEOBACTERIA, DELTAPROTEOBACTERIA, ALPHAPROTEOBACTERIA, GAMMAPROTEOBACTERIA, CYANOBACTERIA, GNS BACTERIA, VERRUCOMICROBIA, HIGH GC GRAM+ BACTERIA | PROTIST: AMOEBOZOA | ARCHAEA: METHANOMICROBIA	BACTERIA | PROTIST | ARCHAEA
Minc16907	Y	9	UDPGT	metabolic process		transferase activity, transferring hexosyl groups			GT*_GT1	Detoxification / Modulation of plant defense ?	A	VITIS VINIFERA	VIRIDIPLANTAE: STREPTOPHYTA	PLANT
Minc17268	Y	2							PL*_PL3	Pectin	A	STREPTOMYCES SP	BACTERIA: ACTINOBACTERIA	BACTERIA
Minc17843		2									A	NOSTOC SP, THERMOMICROBIUM ROSEUM, SPHAEROBACTER THERMOPHILUS, PELODICTYON PHAEOCLATHRATIFORME, CHLOROBIUM LIMICOLA,CHLOROBIUM PHAEOBACTEROIDES, CHLOROBIUM FERROOXIDANS, CHLOROBIUM LUTEOLUM, CHLOROBIUM PHAEOVIBRIOIDES, CHLOROBACULUM PARVUM, CHLOROBIUM TEPIDUM, PROSTHECOCHLORIS AESTUARII, SPHINGOMONAS SP, METHYLOBACTERIUM RADIOTOLERANS, METHYLOBACTERIUM SP, METHYLOBACTERIUM NODULANS, MAGNETOSPIRIL…	BACTERIA: CYANOBACTERIA, BETAPROTEOBACTERIA, ALPHAPROTEOBACTERIA (RHIZOBIALES), GAMMAPROTEOBACTERIA, THERMOMICROBIA, PLANCTOMYCETIA, VERRUCOMICROBIA, CHLOROBIA	BACTERIA
Minc17844a		4	Glycos_transf_1	biosynthetic process					GT4		A	MESORHIZOBIUM LOTI, NITROSOCOCCUS OCEANI, SYNECHOCOCCUS SP, GEOBACTER SP, PSEUDOMONAS SYRINGAE, BURKHOLDERIA OKLAHOMENSIS, GLUCONACETOBACTER DIAZOTROPHICUS, BURKHOLDERIA PHYMATUM, BURKHOLDERIA SP, BURKHOLDERIA PHYTOFIRMANS, BURKHOLDERIA XENOVORANS, BURKHOLDERIA SP, BURKHOLDERIA GRAMINIS, BURKHOLDERIA THAILANDENSIS, BURKHOLDERIA OKLAHOMENSIS, BURKHOLDERIA MALLEI, BURKHOLDERIA PSEUDOMALLEI, BURKHOL…	BACTERIA: CYANOBACTERIA, BETAPROTEOBACTERIA, ALPHAPROTEOBACTERIA (incl. RHIZOBIALES), DELTAPROTEOBACTERIA, GAMMAPROTEOBACTERIA	BACTERIA
Minc18072		5	Aminotran_1_2	biosynthetic process		pyridoxal phosphate binding, transferase activity, transferring nitrogenous groups					A	ARABIDOPSIS THALIANA, NICOTIANA GLUTINOSA, NICOTIANA ATTENUATA, PYRUS COMMUNIS, MALUS X DOMESTICA, PHYSCOMITRELLA PATENS, ROSA HYBRID CULTIVAR	VIRIDIPLANTAE: EMBRYOPHITA	PLANT
Minc18152		3	Lon_C	proteolysis	protein metabolic process	ATP-dependent peptidase activity, serine-type endopeptidase activity	peptidase activity				A	CANDIDA DUBLINIENSIS, CANDIDA ALBICANS, CANDIDA TROPICALIS, PELOBACTER CARBINOLICUS, MARINOMONAS SP, PSEUDOMONAS SYRINGAE, AZOTOBACTER VINELANDII, THIOMICROSPIRA CRUNOGENA, HAHELLA CHEJUENSIS, THIOBACILLUS DENITRIFICANS, MAGNETOCOCCUS SP, FUSOBACTERIUM MORTIFERUM, FUSOBACTERIUM SP, FUSOBACTERIUM NUCLEATUM, FUSOBACTERIUM SP, LEPTOTRICHIA GOODFELLOWII, BORRELIA GARINII, BORRELIA VALAISIANA, BORRELI…	BACTERIA: GAMMAPROTEOBACTERIA, ALPHAPROTEOBACTERIA, DELTAPROTEOBACTERIA, AQUIFICAE, FIRMICUTES, BACILIALES, FUSOBACTERIA, NITROSPIRAE, SPIROCHAETES, ACTINOBACTERIA, PLANCTOMYCETES, DICTYOGLOMI | FUNGI: DIKARYA	BACTERIA + FUNGI
Minc18364		6	Homeobox	regulation of transcription, DNA-dependent		sequence-specific DNA binding, sequence-specific DNA binding transcription factor activity					A	ORYZA SATIVA INDICA GROUP, ORYZA SATIVA JAPONICA GROUP	VIRIDIPLANTAE: STREPTOPHYTA	PLANT
Minc18449		4									A	BURKHOLDERIA PSEUDOMALLEI	BACTERIA: BETAPROTEOBACTERIA	BACTERIA
Minc19145a		5									A	BACILLUS SELENITIREDUCENS	BACTERIA: FIRMICUTES	BACTERIA
Minc03310		9	Skp1_POZ, Skp1	ubiquitin-dependent protein catabolic process	protein metabolic process						A	POPULUS TRICHOCARPA	VIRIDIPLANTAE: STREPTOPHYTA	PLANT
Mh_Contig1342:3276..4873		3									No	N /A	N /A	N /A
Minc16701		2	DUF889								No	N /A	N /A	N /A
Minc14926		1									No	N /A	N /A	N /A
Minc00929	Y	2	UPF57					integral to membrane			No	N /A	N /A	N /A
Mh_Contig315:23741..24481		2									No	N /A	N /A	N /A
Mh_Contig223:32754..33056	Y	1									No	N /A	N /A	N /A
Minc16344		7	Viral_helicase1			helicase activity | hydrolase activity					No	N /A	N /A	N /A
Minc01353	Y	3									No	N /A	N /A	N /A
Mh_Contig686:53022..54413		5	Macro								No	N /A	N /A	N /A
Minc01522c		4	Pectate_lyase			pectate lyase activity	catalytic activity	extracellular region	PL3 pectate lyase	Pectin	No	N /A	N /A	N /A
Minc09796		2	ubiquitin								No	N /A	N /A	N /A
Minc09262		3									No	N /A	N /A	N /A
Minc02456	Y	1	DnaJ			heat shock protein binding					No	N /A	N /A	N /A
Minc18543b	Y	8	fn3, Glyco_hydro_28	carbohydrate metabolic process	carbohydrate metabolic process	polygalacturonase activity	hydrolase activity		GH28 polygalacturonase	Pectin, polygalacturonan	No	N /A	N /A	N /A
Mh_Contig1462:32297..32789		2									No	N /A	N /A	N /A
Minc10684		1	zf-CCHC			nucleic acid binding, zinc ion binding					No	N /A	N /A	N /A
Minc11352		4	Cellulase	carbohydrate metabolic process	carbohydrate metabolic process	hydrolase activity, hydrolyzing O-glycosyl compounds	hydrolase activity		GH5 cellulase	Cellulose	No	N /A	N /A	N /A
Mh_Contig338:88903..90108	Y	3									No	N /A	N /A	N /A
Mh_Contig344:7550..8690	Y	4	Cellulase	carbohydrate metabolic process	carbohydrate metabolic process	hydrolase activity, hydrolyzing O-glycosyl compounds	hydrolase activity		GH5 cellulase	Cellulose	No	N /A	N /A	N /A
Minc18711	Y	7	Cellulase	carbohydrate metabolic process	carbohydrate metabolic process	hydrolase activity, hydrolyzing O-glycosyl compounds	hydrolase activity		GH5 cellulase	Cellulose	No	N /A	N /A	N /A
Minc01513		6	Pectate_lyase			pectate lyase activity	catalytic activity	extracellular region	PL3 pectate lyase	Pectin	No	N /A	N /A	N /A
Minc03618	Y	4	Pectate_lyase			pectate lyase activity	catalytic activity	extracellular region	PL3 pectate lyase	Pectin	No	N /A	N /A	N /A
Minc04661	Y	4	Pectate_lyase			pectate lyase activity	catalytic activity	extracellular region	PL3 pectate lyase	Pectin	No	N /A	N /A	N /A
Minc13942		4	zf-C3HC4, Pectate_lyase			pectate lyase activity	catalytic activity	extracellular region	PL3 pectate lyase	Pectin	No	N /A	N /A	N /A
Minc14254	Y	5	Pectate_lyase			pectate lyase activity	catalytic activity	extracellular region	PL3 pectate lyase	Pectin	No	N /A	N /A	N /A
Minc01516		3	Pectate_lyase			pectate lyase activity	catalytic activity	extracellular region	PL3 pectate lyase	Pectin	No	N /A	N /A	N /A
Mh_Contig1905:1608..2586	Y	4	DPBB_1								No	N /A	N /A	N /A
Mh_Contig498:56225..60351	Y	6									No	N /A	N /A	N /A
Minc02089b		2									No	N /A	N /A	N /A
Minc07193		13	Lon_C	proteolysis	protein metabolic process	ATP-dependent peptidase activity, serine-type endopeptidase activity	peptidase activity				No	N /A	N /A	N /A
Minc07774		1									No	N /A	N /A	N /A
Minc13280		4	NTP_transf_2			nucleotidyltransferase activity					No	N /A	N /A	N /A
Minc14569		1	Retrotrans_gag						Retrotransposon gag protein		No	N /A	N /A	N /A
Minc17204		8									No	N /A	N /A	N /A
Mh_Contig222:436..1253		3	CBM_2	carbohydrate metabolic process	carbohydrate metabolic process	carbohydrate binding; hydrolase activity, hydrolyzing O-glycosyl compounds	hydrolase activity		GH5 cellulase (frag) + CBM2	Cellulose	No	N /A	N /A	N /A
Mh_Contig2637:1751..5651		6	Glyco_hydro_28	carbohydrate metabolic process	carbohydrate metabolic process	polygalacturonase activity	hydrolase activity		GH28	pectin; polygalacturonan	No	N /A	N /A	N /A
Mh_Contig329:2370..3481		4	Pectate_lyase			pectate lyase activity	catalytic activity	extracellular region	PL3 pectate lyase	Pectin	No	N /A	N /A	N /A
Mh_Contig338:76976..78669		4	Pectate_lyase			pectate lyase activity	catalytic activity	extracellular region	PL3 pectate lyase	Pectin	No	N /A	N /A	N /A
Minc01512	Y	7	Pectate_lyase			pectate lyase activity	catalytic activity	extracellular region	PL3 pectate lyase	Pectin	No	N /A	N /A	N /A
Minc01514		5	Pectate_lyase			pectate lyase activity	catalytic activity	extracellular region	PL3 pectate lyase	Pectin	No	N /A	N /A	N /A
Minc02729		2	DUF889								No	N /A	N /A	N /A
Minc06202		11	Pkinase	protein amino acid phosphorylation	protein modification process	ATP binding, protein kinase activity	protein kinase activity | nucleotide binding				No	N /A	N /A	N /A
Minc08100		3	ResIII			ATP binding, DNA binding, hydrolase activity	nucleotide binding | hydrolase activity				No	N /A	N /A	N /A
Minc09098		3	Pectate_lyase			pectate lyase activity	catalytic activity	extracellular region	PL3 pectate lyase	Pectin	No	N /A	N /A	N /A
Minc09783		4	Pectate_lyase			pectate lyase activity	catalytic activity	extracellular region	PL3 pectate lyase	Pectin	No	N /A	N /A	N /A
Minc11251		4									No	N /A	N /A	N /A
Minc12283		8	Pkinase	protein amino acid phosphorylation	protein modification process	ATP binding, protein kinase activity	protein kinase activity | nucleotide binding				No	N /A	N /A	N /A
Minc14704		6									No	N /A	N /A	N /A
Minc15116		4	zf-C3HC4								No	N /A	N /A	N /A
Minc15345		2	DUF1768								No	N /A	N /A	N /A
Minc18743	Y	4	Pectate_lyase			pectate lyase activity	catalytic activity	extracellular region	PL3 pectate lyase	Pectin	No	N /A	N /A	N /A
Minc19090a	Y	6	Cellulase	carbohydrate metabolic process	carbohydrate metabolic process	hydrolase activity, hydrolyzing O-glycosyl compounds	hydrolase activity		GH5 cellulase	Cellulose	No	N /A	N /A	N /A
Mh_Contig0:89781..90953		2									No	N /A	N /A	N /A
Mh_Contig100:44455..47695		8									No tree	N /A	N /A	N /A
Mh_Contig1002:21382..21754		2	UDPGT	metabolic process		transferase activity, transferring hexosyl groups			GT1		No	N /A	N /A	N /A
Mh_Contig1006:18037..19301		3	Pkinase	protein amino acid phosphorylation	protein modification process	ATP binding, protein kinase activity	protein kinase activity | nucleotide binding				No	N /A	N /A	N /A
Mh_Contig1006:20318..20667		2									No	N /A	N /A	N /A
Mh_Contig1006:3712..5426		4									No tree	N /A	N /A	N /A
Mh_Contig1007:14563..15340		2	Pkinase	protein amino acid phosphorylation	protein modification process	ATP binding, protein kinase activity	protein kinase activity | nucleotide binding				No	N /A	N /A	N /A
Mh_Contig1048:1362..2558		5	BTB			protein binding					No	N /A	N /A	N /A
Mh_Contig1065:25107..25583		2									No tree	N /A	N /A	N /A
Mh_Contig1065:46973..47482		1	zf-CCHC			nucleic acid binding, zinc ion binding					No	N /A	N /A	N /A
Mh_Contig1079:24047..24524		3									No tree	N /A	N /A	N /A
Mh_Contig1084:7287..10085		7	Pkinase	protein amino acid phosphorylation	protein modification process	ATP binding, protein kinase activity	protein kinase activity | nucleotide binding				No	N /A	N /A	N /A
Mh_Contig1088:1127..1680		3	Pkinase	protein amino acid phosphorylation	protein modification process		protein kinase activity | nucleotide binding				No	N /A	N /A	N /A
Mh_Contig1088:2573..3832		4	Pkinase	protein amino acid phosphorylation	protein modification process	ATP binding, protein kinase activity	protein kinase activity | nucleotide binding				No	N /A	N /A	N /A
Mh_Contig1088:4136..4452		2	Pkinase	protein amino acid phosphorylation	protein modification process	ATP binding, protein kinase activity	protein kinase activity | nucleotide binding				No	N /A	N /A	N /A
Mh_Contig110:12550..12864		1	Ank								No tree	N /A	N /A	N /A
Mh_Contig111:31273..32163		5	Peptidase_M18	proteolysis	protein metabolic process	aminopeptidase activity, zinc ion binding	peptidase activity	vacuole			No	N /A	N /A	N /A
Mh_Contig1120:1..705		1									No	N /A	N /A	N /A
Mh_Contig113:16689..17064		2									No	N /A	N /A	N /A
Mh_Contig1144:15495..17013		6									No tree	N /A	N /A	N /A
Mh_Contig1186:5597..6585		2									No tree	N /A	N /A	N /A
Mh_Contig1191:1139..3488		9	Plus-3	histone modification, transcription initiation	protein modification process	DNA binding		nucleus			No	N /A	N /A	N /A
Mh_Contig1228:10484..10978		2	Lon_C	proteolysis	protein metabolic process	ATP-dependent peptidase activity, serine-type endopeptidase activity	peptidase activity				No tree	N /A	N /A	N /A
Mh_Contig1229:14544..14900		2									No	N /A	N /A	N /A
Mh_Contig125:35297..35765		3									No	N /A	N /A	N /A
Mh_Contig1276:2051..2623	Y	1	Peptidase_C1	proteolysis	protein metabolic process	cysteine-type peptidase activity	peptidase activity				No	N /A	N /A	N /A
Mh_Contig1292:26929..27617		3									No	N /A	N /A	N /A
Mh_Contig1294:8364..8963		1	zf-CCHC			nucleic acid binding, zinc ion binding					No	N /A	N /A	N /A
Mh_Contig1298:17354..18698		6									No	N /A	N /A	N /A
Mh_Contig1322:43907..45284		5									No tree	N /A	N /A	N /A
Mh_Contig1339:11090..12234		3	Gal-bind_lectin			sugar binding					No	N /A	N /A	N /A
Mh_Contig1350:13794..18239		8	Peptidase_M41	proteolysis	protein metabolic process	ATP binding, metalloendopeptidase activity	nucleotide binding | peptidase activity				No	N /A	N /A	N /A
Mh_Contig1353:19692..20393		2									No	N /A	N /A	N /A
Mh_Contig1356:24269..24857		2	HtrL_YibB								No	N /A	N /A	N /A
Mh_Contig1358:12963..13248	Y	2									No tree	N /A	N /A	N /A
Mh_Contig1371:11610..12310		4									No tree	N /A	N /A	N /A
Mh_Contig1379:36461..38177		4	UPF564, SMC_N			ATP binding	nucleotide binding	chromosome			No tree	N /A	N /A	N /A
Mh_Contig1391:2492..2999		2									No	N /A	N /A	N /A
Mh_Contig1411:6387..9502		2	PAP_central	transcription		polynucleotide adenylyltransferase activity					No	N /A	N /A	N /A
Mh_Contig142:11957..13413		3									No tree	N /A	N /A	N /A
Mh_Contig1421:15127..15796		4									No	N /A	N /A	N /A
Mh_Contig1430:2224..2951		3									No	N /A	N /A	N /A
Mh_Contig1469:31255..34412		10	Sugar_tr	transmembrane transport, transport		transporter activity		integral to membrane			No	N /A	N /A	N /A
Mh_Contig1473:7768..8561		6	Peptidase_S9	proteolysis	protein metabolic process	serine-type peptidase activity	peptidase activity				No	N /A	N /A	N /A
Mh_Contig1476:10946..11632		3	Macro								No	N /A	N /A	N /A
Mh_Contig150:34852..35262		2									No	N /A	N /A	N /A
Mh_Contig1534:607..1216		2	SBP56			selenium binding					No	N /A	N /A	N /A
Mh_Contig1551:291..395		1									No	N /A	N /A	N /A
Mh_Contig1573:33805..34487		4									No tree	N /A	N /A	N /A
Mh_Contig1622:21733..23214		2									No	N /A	N /A	N /A
Mh_Contig1624:25749..26030		1									No tree	N /A	N /A	N /A
Mh_Contig163:16254..16519		2	DUF913								No tree	N /A	N /A	N /A
Mh_Contig1636:15520..15909		2									No	N /A	N /A	N /A
Mh_Contig1647:8937..9780		3									No	N /A	N /A	N /A
Mh_Contig1658:1363..1725		1									No	N /A	N /A	N /A
Mh_Contig1699:12037..12462		1	Retrotrans_gag						Retrotransposon gag protein		No	N /A	N /A	N /A
Mh_Contig1699:3078..3485		1									No	N /A	N /A	N /A
Mh_Contig1706:1416..1680		2	ubiquitin								No	N /A	N /A	N /A
Mh_Contig1718:11849..12316		3									No	N /A	N /A	N /A
Mh_Contig1742:99..774		1									No	N /A	N /A	N /A
Mh_Contig1749:4008..5039		3	Pkinase	protein amino acid phosphorylation	protein modification process	ATP binding,protein kinase activity	protein kinase activity | nucleotide binding				No	N /A	N /A	N /A
Mh_Contig177:13704..17223		6									No	N /A	N /A	N /A
Mh_Contig1782:211..1117	Y	5									No tree	N /A	N /A	N /A
Mh_Contig1786:1647..3324	Y	5	LysM	cell wall macromolecule catabolic process							No	N /A	N /A	N /A
Mh_Contig179:32323..33388		3									No	N /A	N /A	N /A
Mh_Contig185:7993..8565	Y	3	CRAL_TRIO								No tree	N /A	N /A	N /A
Mh_Contig1872:6692..9668		8									No tree	N /A	N /A	N /A
Mh_Contig1905:19491..19913	Y	1									No	N /A	N /A	N /A
Mh_Contig194:82571..85541		10	CBM_20	carbohydrate metabolic process	carbohydrate metabolic process	catalytic activity	catalytic activity		CBM*_CBM20	starch	No tree	N /A	N /A	N /A
Mh_Contig1952:3563..4084		2	DUF1768								No	N /A	N /A	N /A
Mh_Contig1952:4183..4794		2									No	N /A	N /A	N /A
Mh_Contig196:12670..13375		3	Aminotran_5	metabolic process							No	N /A	N /A	N /A
Mh_Contig203:28264..29679		2									No	N /A	N /A	N /A
Mh_Contig2051:11614..13333	Y	3									No tree	N /A	N /A	N /A
Mh_Contig2076:560..761		1	Pectate_lyase			pectate lyase activity	catalytic activity	extracellular region	Fragment of a PL3 pectate lyase	Pectin	No	N /A	N /A	N /A
Mh_Contig210:5084..9246	Y	5	Lon_C, Ldl_recept_a	proteolysis	protein metabolic process	ATP-dependent peptidase activity, serine-type endopeptidase activity	peptidase activity				No	N /A	N /A	N /A
Mh_Contig2111:14720..16965		6	zf-BED			DNA binding					No tree	N /A	N /A	N /A
Mh_Contig213:26674..27780		5									No	N /A	N /A	N /A
Mh_Contig215:40956..41173		2									No tree	N /A	N /A	N /A
Mh_Contig2157:320..581		1	PAP_central	transcription		polynucleotide adenylyltransferase activity					No	N /A	N /A	N /A
Mh_Contig217:68689..69810		4									No tree	N /A	N /A	N /A
Mh_Contig2206:7096..8871	Y	5	Pkinase	protein amino acid phosphorylation	protein modification process	ATP binding, protein kinase activity	protein kinase activity | nucleotide binding				No tree	N /A	N /A	N /A
Mh_Contig234:13813..14556		4									No tree	N /A	N /A	N /A
Mh_Contig2345:448..721		1	PAP_central	transcription		polynucleotide adenylyltransferase activity					No	N /A	N /A	N /A
Mh_Contig2493:11229..12289		4									No	N /A	N /A	N /A
Mh_Contig2526:1076..1498		2	PAP_central	transcription		polynucleotide adenylyltransferase activity					No	N /A	N /A	N /A
Mh_Contig253:35146..35610		2									No tree	N /A	N /A	N /A
Mh_Contig2564:2814..4268		4									No tree	N /A	N /A	N /A
Mh_Contig2572:6518..8025		5									No	N /A	N /A	N /A
Mh_Contig2580:341..1114		2									No	N /A	N /A	N /A
Mh_Contig2597:4515..4800		2	Endonuclease_NS			hydrolase activity, metal ion binding, nucleic acid binding	hydrolase activity				No	N /A	N /A	N /A
Mh_Contig261:28116..28776		3									No tree	N /A	N /A	N /A
Mh_Contig262:35108..35450		2									No	N /A	N /A	N /A
Mh_Contig2635:6238..8894		8	AMP-binding	metabolic process		catalytic activity	catalytic activity				No	N /A	N /A	N /A
Mh_Contig271:79962..81127		8	Piwi								No	N /A	N /A	N /A
Mh_Contig271:86594..88195		10	Piwi								No	N /A	N /A	N /A
Mh_Contig271:88263..89373		6	PAZ								No	N /A	N /A	N /A
Mh_Contig2718:1789..2170		2									No	N /A	N /A	N /A
Mh_Contig2734:6032..8074		6	B56	signal transduction		protein phosphatase type 2A regulator activity		protein phosphatase type 2A complex			No	N /A	N /A	N /A
Mh_Contig2735:96..2545		9	SNF2_N			ATP binding, DNA binding	nucleotide binding				No	N /A	N /A	N /A
Mh_Contig276:21365..22719		2									No tree	N /A	N /A	N /A
Mh_Contig2798:3917..4113	Y	1									No	N /A	N /A	N /A
Mh_Contig280:54335..54925	Y	4									No tree	N /A	N /A	N /A
Mh_Contig291:12969..14521		6									No tree	N /A	N /A	N /A
Mh_Contig3011:2830..3508		2									No	N /A	N /A	N /A
Mh_Contig304:6033..7033	Y	3									No tree	N /A	N /A	N /A
Mh_Contig3043:141..1910		2									No tree	N /A	N /A	N /A
Mh_Contig309:22344..22856		2									No tree	N /A	N /A	N /A
Mh_Contig31:22677..23585		3	Histone			DNA binding					No	N /A	N /A	N /A
Mh_Contig3141:231..632		2									No	N /A	N /A	N /A
Mh_Contig3141:2576..3016		2									No	N /A	N /A	N /A
Mh_Contig316:24736..25550		3									No	N /A	N /A	N /A
Mh_Contig325:48671..49942		4									No tree	N /A	N /A	N /A
Mh_Contig325:94201..95642		6	Peptidase_M41	proteolysis	protein metabolic process	ATP binding,metalloendopeptidase activity	nucleotide binding | peptidase activity				No	N /A	N /A	N /A
Mh_Contig339:26444..27135		2									No	N /A	N /A	N /A
Mh_Contig34:113196..114116		3									No	N /A	N /A	N /A
Mh_Contig34:37358..37638		2	UDPGT	metabolic process		transferase activity, transferring hexosyl groups					No	N /A	N /A	N /A
Mh_Contig349:4909..6198		6	HSP7								No	N /A	N /A	N /A
Mh_Contig353:115007..118202		7	ResIII			ATP binding,DNA binding, hydrolase activity	nucleotide binding | hydrolase activity				No	N /A	N /A	N /A
Mh_Contig392:32416..33030		3	Pkinase	protein amino acid phosphorylation	protein modification process	ATP binding, protein kinase activity	protein kinase activity | nucleotide binding				No tree	N /A	N /A	N /A
Mh_Contig40:14772..21866		10	ResIII			ATP binding, DNA binding, hydrolase activity	nucleotide binding | hydrolase activity				No	N /A	N /A	N /A
Mh_Contig42:60342..60906		2	zf-CCHC			nucleic acid binding; zinc ion binding					No tree	N /A	N /A	N /A
Mh_Contig423:19122..19577		2									No	N /A	N /A	N /A
Mh_Contig437:28173..28704		3	ubiquitin								No	N /A	N /A	N /A
Mh_Contig438:9363..9826	Y	3	Carboxyl_trans			ligase activity	catalytic activity				No	N /A	N /A	N /A
Mh_Contig441:7808..8603		2									No tree	N /A	N /A	N /A
Mh_Contig441:9113..9393		1	Pkinase	protein amino acid phosphorylation	protein modification proces	ATP binding, protein kinase activity	protein kinase activity | nucleotide binding				No tree	N /A	N /A	N /A
Mh_Contig481:37889..38143		1									No	N /A	N /A	N /A
Mh_Contig498:28747..33998	Y	6									No	N /A	N /A	N /A
Mh_Contig498:4877..6097		2	Pkinase	protein amino acid phosphorylation	protein modification process	ATP binding, protein kinase activity	protein kinase activity | nucleotide binding				No tree	N /A	N /A	N /A
Mh_Contig518:13938..15508		3									No tree	N /A	N /A	N /A
Mh_Contig53:6073..6849		2									No tree	N /A	N /A	N /A
Mh_Contig546:27865..28487		3									No tree	N /A	N /A	N /A
Mh_Contig561:2573..6105		9	PGAM								No	N /A	N /A	N /A
Mh_Contig581:17076..17996		4									No	N /A	N /A	N /A
Mh_Contig586:60023..60971		5	BTB			protein binding					No	N /A	N /A	N /A
Mh_Contig590:61150..61543		2	tRNA-synt_2c	alanyl-tRNA aminoacylation, translation		alanine-tRNA ligase activity; ATP binding, nucleotide binding	nucleotide binding | catalytic activity	cytoplasm			No	N /A	N /A	N /A
Mh_Contig621:44702..46215		2									No	N /A	N /A	N /A
Mh_Contig656:60588..61806		4	PaREP1								No	N /A	N /A	N /A
Mh_Contig673:1981..2846		2	Chromo	chromatin assembly or disassembly		chromatin binding		chromatin,nucleus			No	N /A	N /A	N /A
Mh_Contig697:4549..4188		2									No	N /A	N /A	N /A
Mh_Contig700:18198..18710		2	SPRY								No	N /A	N /A	N /A
Mh_Contig711:20225..20702		2									No tree	N /A	N /A	N /A
Mh_Contig720:86968..87504	Y	2									No	N /A	N /A	N /A
Mh_Contig734:13852..15696		5									No	N /A	N /A	N /A
Mh_Contig754:22770..22986		2	tRNA_Me_trans	tRNA processing		transferase activity		cytoplasm			No	N /A	N /A	N /A
Mh_Contig756:39205..39849		4									No	N /A	N /A	N /A
Mh_Contig79:50889..51683	Y	2									No tree	N /A	N /A	N /A
Mh_Contig817:11717..12689		3									No tree	N /A	N /A	N /A
Mh_Contig83:4788..5312		2	Pkinase	protein amino acid phosphorylation	protein modification process	ATP binding,protein kinase activity	protein kinase activity | nucleotide binding				No	N /A	N /A	N /A
Mh_Contig845:462..998		2									No	N /A	N /A	N /A
Mh_Contig870:10453..10707		2									No	N /A	N /A	N /A
Mh_Contig874:28956..29889	Y	3									No tree	N /A	N /A	N /A
Mh_Contig884:6500..6764		2	PCI_Csn8								No	N /A	N /A	N /A
Mh_Contig896:2074..4723		10									No	N /A	N /A	N /A
Mh_Contig917:47725..48771		1	zf-CCHC			nucleic acid binding,zinc ion binding					No	N /A	N /A	N /A
Mh_Contig917:6411..6852		2	Rad6-SLD								No tree	N /A	N /A	N /A
Mh_Contig934:38417..40161		6									No	N /A	N /A	N /A
Mh_Contig934:821..2390		5									No	N /A	N /A	N /A
Mh_Contig935:13535..15092		5									No	N /A	N /A	N /A
Mh_Contig935:2117..3161		6	FMN_dh			oxidoreductase activity	catalytic activity				No	N /A	N /A	N /A
Mh_Contig945:29178..30092		2	Prefoldin_2	protein folding	protein metabolic process	unfolded protein binding		prefoldin complex			No tree	N /A	N /A	N /A
Mh_Contig945:46765..47433		3									No tree	N /A	N /A	N /A
Mh_Contig949:7106..8269		5									No	N /A	N /A	N /A
Mh_Contig965:16319..16668		2									No	N /A	N /A	N /A
Mh_Contig976:13549..14530		4									No	N /A	N /A	N /A
Mh_Contig985:19166..20820		7									No tree	N /A	N /A	N /A
Minc00047		4									No	N /A	N /A	N /A
Minc00084		1									No tree	N /A	N /A	N /A
Minc00095		5									No	N /A	N /A	N /A
Minc00135		5	Lon_C	proteolysis	protein metabolic process	ATP-dependent peptidase activity, serine-type endopeptidase activity	peptidase activity				No	N /A	N /A	N /A
Minc00168	Y	5	Cellulase	carbohydrate metabolic process	carbohydrate metabolic process	hydrolase activity, hydrolyzing O-glycosyl compounds	hydrolase activity		GH5 cellulase	Cellulose	No	N /A	N /A	N /A
Minc00220		4	IF4E	translational initiation		RNA binding, translation initiation factor activity		cytoplasm			No tree	N /A	N /A	N /A
Minc00221		4	IF4E	translational initiation		RNA binding, translation initiation factor activity		cytoplasm			No tree	N /A	N /A	N /A
Minc00269		2									No	N /A	N /A	N /A
Minc00477		1									No	N /A	N /A	N /A
Minc00554		2	Ank								No	N /A	N /A	N /A
Minc00591		5	Lon_C	proteolysis	protein metabolic process	ATP-dependent peptidase activity, serine-type endopeptidase activity	peptidase activity				No	N /A	N /A	N /A
Minc00618		2	Peptidase_M41	proteolysis	protein metabolic process	ATP binding, metalloendopeptidase activity	nucleotide binding | peptidase activity				No	N /A	N /A	N /A
Minc00932a	Y	3	UPF57					integral to membrane			No	N /A	N /A	N /A
Minc01035		2									No	N /A	N /A	N /A
Minc01052		3							Chorismate Mutase-Like		No tree	N /A	N /A	N /A
Minc01058		9									No tree	N /A	N /A	N /A
Minc01130		6									No	N /A	N /A	N /A
Minc01363		4									No tree	N /A	N /A	N /A
Minc01503		2	DUF1768								No	N /A	N /A	N /A
Minc01545		5									No	N /A	N /A	N /A
Minc01581	Y	10	zf-C3HC4								No tree	N /A	N /A	N /A
Minc01585	Y	9									No	N /A	N /A	N /A
Minc01646		5	Histone			DNA binding					No	N /A	N /A	N /A
Minc01667		4	Histone			DNA binding					No	N /A	N /A	N /A
Minc01669		17	DUF1279, TPR_1, cwf18, RLI, Fer4								No	N /A	N /A	N /A
Minc01776		3									No tree	N /A	N /A	N /A
Minc01877		3									No tree	N /A	N /A	N /A
Minc01956		6	RRM_1			nucleic acid binding					No	N /A	N /A	N /A
Minc02346	Y	5									No	N /A	N /A	N /A
Minc02513		9	DEAD, Helicase_C			ATP binding; ATP-dependent helicase activity, helicase activity, nucleic acid binding	nucleotide binding | hydrolase activity				No	N /A	N /A	N /A
Minc02560		1									No tree	N /A	N /A	N /A
Minc02595		3	CSD	regulation of transcription, DNA-dependent		DNA binding					No	N /A	N /A	N /A
Minc02907		2	DUF1768								No	N /A	N /A	N /A
Minc03028		3	Skp1	ubiquitin-dependent protein catabolic process	protein metabolic process						No tree	N /A	N /A	N /A
Minc03058		2									No	N /A	N /A	N /A
Minc03065		6	CAF1					nucleus			No	N /A	N /A	N /A
Minc03096	Y	4	zf-C3HC4								No	N /A	N /A	N /A
Minc03283		2									No	N /A	N /A	N /A
Minc03483c		5									No	N /A	N /A	N /A
Minc03527		13	Pkinase	protein amino acid phosphorylation	protein modification process	ATP binding, protein kinase activity	protein kinase activity | nucleotide binding				No	N /A	N /A	N /A
Minc03797		3									No	N /A	N /A	N /A
Minc03798		4	E1-E2_ATPase	ATP biosynthetic process		ATP binding; hydrolase activity, acting on acid anhydrides, catalyzing transmembrane movement of substances	nucleotide binding | hydrolase activity	membrane			No	N /A	N /A	N /A
Minc03844		4									No	N /A	N /A	N /A
Minc04030		1									No	N /A	N /A	N /A
Minc04132		3	Lon_C	proteolysis	protein metabolic process	ATP-dependent peptidase activity, serine-type endopeptidase activity	peptidase activity				No	N /A	N /A	N /A
Minc04230		2									No	N /A	N /A	N /A
Minc04298		9	zf-C3HC4								No tree	N /A	N /A	N /A
Minc04301		4	PGAM								No	N /A	N /A	N /A
Minc04404		3	PRMT5			methyltransferase activity		cytoplasm			No	N /A	N /A	N /A
Minc04479		5									No tree	N /A	N /A	N /A
Minc04484		2									No tree	N /A	N /A	N /A
Minc04506		7									No tree	N /A	N /A	N /A
Minc04622		5	BTB			protein binding					No	N /A	N /A	N /A
Minc04655		5									No	N /A	N /A	N /A
Minc04673		3									No	N /A	N /A	N /A
Minc04710		5	AICARFT_IMPCHas	IMP biosynthetic process		catalytic activity	catalytic activity				No	N /A	N /A	N /A
Minc04736		6									No	N /A	N /A	N /A
Minc04920a		4									No	N /A	N /A	N /A
Minc04950		4	Profilin	cytoskeleton organization		actin binding		actin cytoskeleton			No	N /A	N /A	N /A
Minc04951		5	FLYWCH								No tree	N /A	N /A	N /A
Minc05055		4									No	N /A	N /A	N /A
Minc05439	Y	5									No	N /A	N /A	N /A
Minc05459	Y	3									No tree	N /A	N /A	N /A
Minc05492		2									No	N /A	N /A	N /A
Minc05496		9	Metallophos			hydrolase activity	hydrolase activity				No	N /A	N /A	N /A
Minc05641		5	DUF83								No	N /A	N /A	N /A
Minc05713		1									No tree	N /A	N /A	N /A
Minc05795		4	Lon_C	proteolysis	protein metabolic process	ATP-dependent peptidase activity, serine-type endopeptidase activity	peptidase activity				No	N /A	N /A	N /A
Minc05961	Y	10	UDPGT	metabolic process		transferase activity, transferring hexosyl groups			GT1	Detoxification / Modulation of plant defense ?	No tree	N /A	N /A	N /A
Minc05963		7	UDPGT	metabolic process		transferase activity, transferring hexosyl groups			GT1	Detoxification / Modulation of plant defense ?	No	N /A	N /A	N /A
Minc05984		6	RLI, DUF367								No	N /A	N /A	N /A
Minc06039		7	adh_short	metabolic process		oxidoreductase activity	catalytic activity				No	N /A	N /A	N /A
Minc06065		2	PfkB								No	N /A	N /A	N /A
Minc06074		3	UCH	ubiquitin-dependent protein catabolic process	protein metabolic process	ubiquitin thiolesterase activity	hydrolase activity				No	N /A	N /A	N /A
Minc06075		4	UCH	ubiquitin-dependent protein catabolic process	protein metabolic process	ubiquitin thiolesterase activity	hydrolase activity				No tree	N /A	N /A	N /A
Minc06128		1	DUF2431								No	N /A	N /A	N /A
Minc06255		8									No tree	N /A	N /A	N /A
Minc06289	Y	7	Pectate_lyase			pectate lyase activity	catalytic activity	extracellular region	PL3 pectate lyase	Pectin	No	N /A	N /A	N /A
Minc06511		2	PAZ								No	N /A	N /A	N /A
Minc06518		9	Nuf2	mitosis				chromosome, centromeric region			No tree	N /A	N /A	N /A
Minc06566		3	Pkinase	protein amino acid phosphorylation	protein modification process	ATP binding, protein kinase activity	protein kinase activity | nucleotide binding				No	N /A	N /A	N /A
Minc06825		5									No	N /A	N /A	N /A
Minc07085	Y	6	PITH								No	N /A	N /A	N /A
Minc07124	Y	3									No tree	N /A	N /A	N /A
Minc07130		4	efhand								No	N /A	N /A	N /A
Minc07176		3									No	N /A	N /A	N /A
Minc07277		1	Phlebovirus_G2								No tree	N /A	N /A	N /A
Minc07481		2									No	N /A	N /A	N /A
Minc07542	Y	4									No	N /A	N /A	N /A
Minc07553		3									No	N /A	N /A	N /A
Minc07649		23	DUF889, OTU								No	N /A	N /A	N /A
Minc07762		4	dUTPase	dUTP metabolic process		hydrolase activity	hydrolase activity				No	N /A	N /A	N /A
Minc07773		5									No	N /A	N /A	N /A
Minc07820		3	AIG2								No	N /A	N /A	N /A
Minc07825		2									No tree	N /A	N /A	N /A
Minc07926		1									No	N /A	N /A	N /A
Minc08025		3									No tree	N /A	N /A	N /A
Minc08147		3	ThiS	sulfur metabolic process							No tree	N /A	N /A	N /A
Minc08151		5	Lon_C	proteolysis	protein metabolic process	ATP-dependent peptidase activity, serine-type endopeptidase activity	peptidase activity				No	N /A	N /A	N /A
Minc08448		3									No	N /A	N /A	N /A
Minc08483		5									No tree	N /A	N /A	N /A
Minc08579c		7	Macro								No	N /A	N /A	N /A
Minc08728		3	Dimer_Tnp_hAT			protein dimerization activity			Transposase Tn5 dimerisation domain		No	N /A	N /A	N /A
Minc08769		3									No	N /A	N /A	N /A
Minc08783		1									No	N /A	N /A	N /A
Minc08790		2									No	N /A	N /A	N /A
Minc08808		10	WD4, Utp13	rRNA processing				small-subunit processome			No	N /A	N /A	N /A
Minc08843		4									No	N /A	N /A	N /A
Minc08845a	Y	5									No tree	N /A	N /A	N /A
Minc08878		6									No	N /A	N /A	N /A
Minc08966		1									No	N /A	N /A	N /A
Minc09058		8									No	N /A	N /A	N /A
Minc09061		5	E1-E2_ATPase	ATP biosynthetic process		ATP binding, hydrolase activity, acting on acid anhydrides, catalyzing transmembrane movement of substances	nucleotide binding | hydrolase activity	membrane			No	N /A	N /A	N /A
Minc09218		10	HSP7								No	N /A	N /A	N /A
Minc09246		6									No	N /A	N /A	N /A
Minc09256		3									No tree	N /A	N /A	N /A
Minc09313		3	Peptidase_S1	proteolysis	protein metabolic process	serine-type carboxypeptidase activity	peptidase activity				No	N /A	N /A	N /A
Minc09314		2	PAZ								No	N /A	N /A	N /A
Minc09366		3	Phlebovirus_G2								No tree	N /A	N /A	N /A
Minc09375		6	UQ_con	post-translational protein modification, regulation of protein metabolic process	protein modification process / protein metabolic process	small conjugating protein ligase activity	catalytic activity				No	N /A	N /A	N /A
Minc09417		10									No	N /A	N /A	N /A
Minc09446b	Y	7	Cellulase	carbohydrate metabolic process	carbohydrate metabolic process	hydrolase activity, hydrolyzing O-glycosyl compounds	hydrolase activity		GH5 cellulase, CBM2	Cellulose	No	N /A	N /A	N /A
Minc09530		1	TBP	regulation of transcription, DNA-dependent, transcription initiation from RNA polymerase II promoter		DNA binding, RNA polymerase II transcription factor activity					No	N /A	N /A	N /A
Minc09717		3	dCMP_cyt_deam_2			cytidine deaminase activity, zinc ion binding	hydrolase activity				No tree	N /A	N /A	N /A
Minc09754		4									No tree	N /A	N /A	N /A
Minc09901		5									No tree	N /A	N /A	N /A
Minc09998		9	tRNA-synt_2c	alanyl-tRNA aminoacylation, translation		alanine-tRNA ligase activity, ATP binding, nucleotide binding	nucleotide binding | catalytic activity	cytoplasm			No	N /A	N /A	N /A
Minc10029		7	zf-CCCH			nucleic acid binding,zinc ion binding					No	N /A	N /A	N /A
Minc10120		3	DnaJ			heat shock protein binding					No	N /A	N /A	N /A
Minc10205		4									No	N /A	N /A	N /A
Minc10305		6									No tree	N /A	N /A	N /A
Minc10308b		3	Proteasome	proteolysis involved in cellular protein catabolic process	protein metabolic process	threonine-type endopeptidase activity	peptidase activity	proteasome core complex			No	N /A	N /A	N /A
Minc10387		5	UDPGT	metabolic process		transferase activity, transferring hexosyl groups			GT1	Detoxification / Modulation of plant defense ?	No	N /A	N /A	N /A
Minc10405	Y	8	Cellulase	carbohydrate metabolic process	carbohydrate metabolic process	hydrolase activity, hydrolyzing O-glycosyl compounds	hydrolase activity		GH5 cellulase	Cellulose	No	N /A	N /A	N /A
Minc10529		1									No	N /A	N /A	N /A
Minc10595		3	HSP7								No	N /A	N /A	N /A
Minc10747		10	WD40								No	N /A	N /A	N /A
Minc10900		6									No	N /A	N /A	N /A
Minc10931b		2	HSP2								No	N /A	N /A	N /A
Minc10996	Y	6									No tree	N /A	N /A	N /A
Minc11109		3									No	N /A	N /A	N /A
Minc11202		2									No	N /A	N /A	N /A
Minc11221		4									No tree	N /A	N /A	N /A
Minc11227		3									No	N /A	N /A	N /A
Minc11302		3	UQ_con	post-translational protein modification, regulation of protein metabolic process	protein modification process / protein metabolic process	small conjugating protein ligase activity	catalytic activity				No	N /A	N /A	N /A
Minc11439		4									No	N /A	N /A	N /A
Minc11492		9									No tree	N /A	N /A	N /A
Minc11564	Y	3	DnaJ			heat shock protein binding					No	N /A	N /A	N /A
Minc11600		1									No	N /A	N /A	N /A
Minc11693		2									No	N /A	N /A	N /A
Minc11768		2	zf-C3HC4								No tree	N /A	N /A	N /A
Minc11770	Y	3							PL3 pectate lyase	Pectin	No	N /A	N /A	N /A
Minc11810	Y	3	Pkinase	protein amino acid phosphorylation	protein modification process	ATP binding,protein kinase activity	protein kinase activity | nucleotide binding				No	N /A	N /A	N /A
Minc11843		8	PCRF, RF-1	translational termination		translation release factor activity, translation release factor activity, codon specific		cytoplasm			No	N /A	N /A	N /A
Minc11871		5	Skp1	ubiquitin-dependent protein catabolic process	protein metabolic process						No tree	N /A	N /A	N /A
Minc11879		4	Macro								No tree	N /A	N /A	N /A
Minc11928b		2									No	N /A	N /A	N /A
Minc11982		25	UvrD-helicase	DNA repair		ATP binding, ATP-dependent DNA helicase activity, DNA binding	nucleotide binding | hydrolase activity				No	N /A	N /A	N /A
Minc12026		11	PAP_central	transcription		polynucleotide adenylyltransferase activity					No	N /A	N /A	N /A
Minc12071		7									No tree	N /A	N /A	N /A
Minc12202		7	Pkinase	protein amino acid phosphorylation	protein modification process	ATP binding, protein kinase activity	protein kinase activity | nucleotide binding				No	N /A	N /A	N /A
Minc12231		3									No	N /A	N /A	N /A
Minc12273		3									No	N /A	N /A	N /A
Minc12287	Y	3									No	N /A	N /A	N /A
Minc12361		9									No tree	N /A	N /A	N /A
Minc12378		4									No	N /A	N /A	N /A
Minc12474c		3									No	N /A	N /A	N /A
Minc12514		5									No tree	N /A	N /A	N /A
Minc12664		6	Cyclin_C					nucleus			No	N /A	N /A	N /A
Minc12674	Y	5	Cellulase	carbohydrate metabolic process	carbohydrate metabolic process	hydrolase activity, hydrolyzing O-glycosyl compounds	hydrolase activity		GH5 cellulase	Cellulose	No	N /A	N /A	N /A
Minc12812		1									No tree	N /A	N /A	N /A
Minc12829		4	Lon_C	proteolysis	protein metabolic process	ATP-dependent peptidase activity, serine-type endopeptidase activity	peptidase activity				No	N /A	N /A	N /A
Minc12900b		7	LRR_1			protein binding					No	N /A	N /A	N /A
Minc12902		13									No tree	N /A	N /A	N /A
Minc13000		2	ubiquitin								No	N /A	N /A	N /A
Minc13029		3									No tree	N /A	N /A	N /A
Minc13345		7	Pkinase	protein amino acid phosphorylation	protein modification process	ATP binding, protein kinase activity	protein kinase activity | nucleotide binding				No tree	N /A	N /A	N /A
Minc13403	Y	7	Pkinase	protein amino acid phosphorylation	protein modification process	ATP binding, protein kinase activity	protein kinase activity | nucleotide binding				No	N /A	N /A	N /A
Minc13502		5	Cellulase	carbohydrate metabolic process	carbohydrate metabolic process	hydrolase activity, hydrolyzing O-glycosyl compounds	hydrolase activity		GH5 cellulase	Cellulose	No	N /A	N /A	N /A
Minc13673		4									No tree	N /A	N /A	N /A
Minc13696		8									No	N /A	N /A	N /A
Minc13698		8	Pkinase	protein amino acid phosphorylation	protein modification process	ATP binding, protein kinase activity	protein kinase activity | nucleotide binding				No	N /A	N /A	N /A
Minc13708		6	zf-C3HC4, ubiquitin								No tree	N /A	N /A	N /A
Minc13767	Y	3	FANCL_C								No tree	N /A	N /A	N /A
Minc13768		2	DPBB_1						EXPN, Expansin-like protein	Plant cell wall	No	N /A	N /A	N /A
Minc13788		3									No	N /A	N /A	N /A
Minc13906		6	Pkinase	protein amino acid phosphorylation	protein modification process	ATP binding, protein kinase activity	protein kinase activity | nucleotide binding				No	N /A	N /A	N /A
Minc13907		2									No	N /A	N /A	N /A
Minc13996		1	Ank								No	N /A	N /A	N /A
Minc14012		3	zf-CCCH			nucleic acid binding, zinc ion binding					No tree	N /A	N /A	N /A
Minc14058		5	F-box								No	N /A	N /A	N /A
Minc14201		2									No	N /A	N /A	N /A
Minc14205		6	DUF1768								No tree	N /A	N /A	N /A
Minc14354		4									No	N /A	N /A	N /A
Minc14425	Y	5									No tree	N /A	N /A	N /A
Minc14460		2	LIM			zinc ion binding					No tree	N /A	N /A	N /A
Minc14733		7	SBDS								No	N /A	N /A	N /A
Minc14766		5	DUF862								No	N /A	N /A	N /A
Minc14816		3									No tree	N /A	N /A	N /A
Minc14927		2									No tree	N /A	N /A	N /A
Minc14946		2									No	N /A	N /A	N /A
Minc14987		3	AAA_5			ATP binding, ATPase activity	nucleotide binding | hydrolase activity				No	N /A	N /A	N /A
Minc15211		3									No	N /A	N /A	N /A
Minc15238		5	RPAP2_Rtr1								No	N /A	N /A	N /A
Minc15269		6	RRM_1			nucleic acid binding					No tree	N /A	N /A	N /A
Minc15392		3	RRM_1			nucleic acid binding					No	N /A	N /A	N /A
Minc15644		3	HMG-CoA_red	coenzyme A metabolic process, oxidation reduction		coenzyme binding, hydroxymethylglutaryl-CoA reductase (NADPH) activity	catalytic activity				No	N /A	N /A	N /A
Minc15940		3									No tree	N /A	N /A	N /A
Minc15942		2	Dimer_Tnp_hAT			protein dimerization activity			Transposase Tn5 dimerisation domain		No	N /A	N /A	N /A
Minc15993a		5									No tree	N /A	N /A	N /A
Minc16043		1	CENP-B_N			DNA binding		chromosome, centromeric region			No	N /A	N /A	N /A
Minc16110		4	SET								No	N /A	N /A	N /A
Minc16189		2									No	N /A	N /A	N /A
Minc16248		4	UDPGT	metabolic process		transferase activity, transferring hexosyl groups			GT1	Detoxification / Modulation of plant defense ?	No	N /A	N /A	N /A
Minc16278		12									No	N /A	N /A	N /A
Minc16333		5	tRNA-synt_2c	alanyl-tRNA aminoacylation, translation		alanine-tRNA ligase activity, ATP binding, nucleotide binding	nucleotide binding | catalytic activity	cytoplasm			No	N /A	N /A	N /A
Minc16475		1									No	N /A	N /A	N /A
Minc16480		4									No	N /A	N /A	N /A
Minc16621		10	TAFII28	transcription initiation from RNA polymerase II promoter		RNA polymerase II transcription factor activity		nucleus			No	N /A	N /A	N /A
Minc16626b		1	Chromo	chromatin assembly or disassembly		chromatin binding		chromatin, nucleus			No	N /A	N /A	N /A
Minc16639	Y	2									No	N /A	N /A	N /A
Minc16667b		3	zf-CCHC			nucleic acid binding, zinc ion binding					No	N /A	N /A	N /A
Minc16860		5									No	N /A	N /A	N /A
Minc16922		6	zf-C3HC4, ubiquitin								No	N /A	N /A	N /A
Minc16954		5									No	N /A	N /A	N /A
Minc16970		6	7TM_GPCR_Srsx								No	N /A	N /A	N /A
Minc16994		2									No	N /A	N /A	N /A
Minc17045		3									No	N /A	N /A	N /A
Minc17211		2							GT1	Detoxification / Modulation of plant defense ?	No	N /A	N /A	N /A
Minc17301		4	zf-C3HC4								No	N /A	N /A	N /A
Minc17599		7									No tree	N /A	N /A	N /A
Minc17661		6	zf-CCCH			nucleic acid binding, zinc ion binding					No tree	N /A	N /A	N /A
Minc17697		3	zf-C3HC4								No tree	N /A	N /A	N /A
Minc17711		4	Pribosyltran	nucleoside metabolic process							No	N /A	N /A	N /A
Minc17898		1									No	N /A	N /A	N /A
Minc18098	Y	1							GH5 cellulase	Cellulose	No	N /A	N /A	N /A
Minc18321		2									No	N /A	N /A	N /A
Minc18345		7									No	N /A	N /A	N /A
Minc18358		6	eIF3_subunit								No	N /A	N /A	N /A
Minc18363		6									No	N /A	N /A	N /A
Minc18429		1									No tree	N /A	N /A	N /A
Minc18447		13	Metallophos			hydrolase activity	hydrolase activity				No	N /A	N /A	N /A
Minc18524		3									No tree	N /A	N /A	N /A
Minc18545		2	zf-C3HC4								No	N /A	N /A	N /A
Minc18568	Y	4							GH25		No tree	N /A	N /A	N /A
Minc18729		5	DUF1768								No	N /A	N /A	N /A
Minc18937b		3									No tree	N /A	N /A	N /A
Minc19084		1									No	N /A	N /A	N /A
Minc19165		3	Peptidase_S1	proteolysis	protein metabolic process	serine-type carboxypeptidase activity	peptidase activity				No	N /A	N /A	N /A
