# Supplementary material for: Contribution of Lateral Gene Transfers to the Genome Composition and Parasitic Ability of Root-Knot Nematodes
Source: PLoS One. 2012 Nov 30;7(11):e50875. doi: 10.1371/journal.pone.0050875 (PMC3511272; doi:10.1371/journal.pone.0050875)
Supplement: Table S3 — Gene Ontology terms assigned to the whole proteomes of root-knot nematodes and to those originating from LGT. For each Gene Ontology (G.O.) category (A) Biological Process, (B) Molecular Function, (C) Cellular Component, the number of occurrence and abundance (in percent) of G.O. terms are given for the whole M. incognita and M. hapla proteomes as well as for the proteins considered as acquired via LGT in root-knot nematodes. For comparison purpose, the relative abundance of a G.O. term in proteins acquired via LGT compared to the average abundance observed in the two root-knot nematode is indicated in percent in the last column. Relative abundance follows a heat map color code ranging from red gradient for terms more abundant (+) in LGT proteins to green gradients for terms less abundant (–) in LGT proteins. Yellow gradient indicates a similar abundance of the term in LGT proteins compared to the whole root-knot nematode proteomes. (XLSX) [file pone.0050875.s004.xlsx]

## Sheet: (A)Biol-Proc
BIOLOGICAL PROCESS
		Abundance			Proportion (%)			Relat. Abund %
GO_ID	GO_description	M. incog	M. hapla	LGT	M. incog	M. hapla	LGT	LGT vs RKN
GO:0006464	protein modification process	617	414	37	8.89818	8.78794	18.593	9.7499
GO:0019538	protein metabolic process	587	331	31	8.46553	7.02611	15.5779	7.83207
GO:0005975	carbohydrate metabolic process	261	160	20	3.76406	3.39631	10.0503	6.47007
GO:0008152	metabolic process	523	394	20	7.54254	8.3634	10.0503	2.09728
GO:0006139	nucleobase, nucleoside, nucleotide and nucleic acid metabolic process	377	287	15	5.43698	6.09212	7.53769	1.77314
GO:0006519	cellular amino acid and derivative metabolic process	117	88	7	1.68734	1.86797	3.51759	1.73993
GO:0006996	organelle organization	92	71	6	1.3268	1.50711	3.01508	1.59812
GO:0009056	catabolic process	227	130	9	3.27372	2.7595	4.52261	1.506
GO:0016043	cellular component organization	83	54	5	1.197	1.14625	2.51256	1.34094
GO:0007049	cell cycle	25	15	1	0.360542	0.318404	0.502513	0.16304
GO:0007010	cytoskeleton organization	24	19	1	0.346121	0.403311	0.502513	0.127797
GO:0030154	cell differentiation	1	1	0	0.0144217	0.0212269	0	-0.0178243
GO:0016032	viral reproduction	0	2	0	0	0.0424538	0	-0.0212269
GO:0009605	response to external stimulus	2	1	0	0.0288434	0.0212269	0	-0.0250351
GO:0040029	regulation of gene expression, epigenetic	2	2	0	0.0288434	0.0424538	0	-0.0356486
GO:0007267	cell-cell signaling	3	2	0	0.0432651	0.0424538	0	-0.0428595
GO:0008283	cell proliferation	3	2	0	0.0432651	0.0424538	0	-0.0428595
GO:0008219	cell death	4	2	0	0.0576868	0.0424538	0	-0.0500703
GO:0007005	mitochondrion organization	6	5	0	0.0865301	0.106135	0	-0.0963324
GO:0000003	reproduction	16	7	0	0.230747	0.148588	0	-0.189668
GO:0006412	translation	255	179	7	3.67753	3.79962	3.51759	-0.220987
GO:0007275	multicellular organismal development	29	11	0	0.418229	0.233496	0	-0.325863
GO:0006629	lipid metabolic process	117	95	3	1.68734	2.01656	1.50754	-0.34441
GO:0019725	cellular homeostasis	34	24	0	0.490337	0.509446	0	-0.499892
GO:0006950	response to stress	68	59	1	0.980675	1.25239	0.502513	-0.614019
GO:0006091	generation of precursor metabolites and energy	68	47	0	0.980675	0.997665	0	-0.98917
GO:0007154	cell communication	76	62	0	1.09605	1.31607	0	-1.20606
GO:0007165	signal transduction	120	104	1	1.7306	2.2076	0.502513	-1.46659
GO:0015031	protein transport	101	80	0	1.45659	1.69815	0	-1.57737
GO:0009058	biosynthetic process	542	354	11	7.81656	7.51433	5.52764	-2.1378
GO:0006811	ion transport	229	179	1	3.30257	3.79962	0.502513	-3.04858
GO:0006350	transcription	620	370	10	8.94145	7.85396	5.02513	-3.37258
GO:0006259	DNA metabolic process	308	205	1	4.44188	4.35152	0.502513	-3.89419
GO:0006810	transport	417	331	5	6.01384	7.02611	2.51256	-4.00741
GO:0008150	biological_process	365	257	2	5.26392	5.45532	1.00503	-4.35459
GO:0050789	regulation of biological process	615	367	5	8.86934	7.79028	2.51256	-5.81725
	Total :	6934	4711	199	100	100	100

## Sheet: (B)Mol-Func
MOLECULAR FUNCTION
		Abundance			Proportion (%)			Relat. Abund %
GO_ID	GO_description	M. incog	M. hapla	LGT	M. incog	M. hapla	LGT	LGT vs RKN
GO:0004672	protein kinase activity	372	259	32	3.95997	4.27746	10.6312	6.51251
GO:0016787	hydrolase activity	660	434	38	7.02576	7.16763	12.6246	5.52789
GO:0000166	nucleotide binding	1184	750	52	12.6038	12.3865	17.2757	4.78062
GO:0003824	catalytic activity	898	635	42	9.55929	10.4872	13.9535	3.93024
GO:0008233	peptidase activity	392	231	22	4.17288	3.81503	7.30897	3.31502
GO:0003676	nucleic acid binding	426	276	17	4.53481	4.55822	5.64784	1.10133
GO:0008135	translation factor activity, nucleic acid binding	35	25	4	0.372578	0.412882	1.3289	0.936174
GO:0003682	chromatin binding	37	28	2	0.393868	0.462428	0.664452	0.236304
GO:0005488	binding	825	498	26	8.7822	8.22461	8.63787	0.134469
GO:0003779	actin binding	23	24	1	0.244837	0.396367	0.332226	0.011624
GO:0003674	molecular_function	2	0	0	0.0212902	0	0	-0.0106451
GO:0030246	carbohydrate binding	69	40	2	0.734511	0.660611	0.664452	-0.0331094
GO:0004871	signal transducer activity	75	37	2	0.798382	0.611065	0.664452	-0.0402718
GO:0008092	cytoskeletal protein binding	5	5	0	0.0532255	0.0825764	0	-0.0679009
GO:0005326	neurotransmitter transporter activity	19	13	0	0.202257	0.214699	0	-0.208478
GO:0005102	receptor binding	18	19	0	0.191612	0.31379	0	-0.252701
GO:0016301	kinase activity	53	46	1	0.56419	0.759703	0.332226	-0.32972
GO:0016209	antioxidant activity	30	23	0	0.319353	0.379851	0	-0.349602
GO:0009055	electron carrier activity	79	35	1	0.840962	0.578035	0.332226	-0.377273
GO:0030528	transcription regulator activity	112	63	2	1.19225	1.04046	0.664452	-0.451905
GO:0008289	lipid binding	40	35	0	0.425804	0.578035	0	-0.501919
GO:0005509	calcium ion binding	44	34	0	0.468384	0.561519	0	-0.514952
GO:0003774	motor activity	42	36	0	0.447094	0.59455	0	-0.520822
GO:0004721	phosphoprotein phosphatase activity	58	42	0	0.617415	0.693642	0	-0.655528
GO:0005215	transporter activity	276	198	7	2.93805	3.27002	2.32558	-0.778454
GO:0030234	enzyme regulator activity	137	114	1	1.45838	1.88274	0.332226	-1.33833
GO:0016740	transferase activity	726	461	19	7.72834	7.61354	6.31229	-1.35865
GO:0005216	ion channel activity	131	108	0	1.39451	1.78365	0	-1.58908
GO:0004518	nuclease activity	207	62	0	2.20353	1.02395	0	-1.61374
GO:0003723	RNA binding	178	177	2	1.89483	2.9232	0.664452	-1.74456
GO:0005515	protein binding	565	394	13	6.01448	6.50702	4.31894	-1.94181
GO:0004872	receptor activity	187	126	0	1.99063	2.08092	0	-2.03578
GO:0003700	transcription factor activity	350	202	1	3.72578	3.33609	0.332226	-3.19871
GO:0003677	DNA binding	781	448	14	8.31382	7.39884	4.65116	-3.20517
GO:0005198	structural molecule activity	358	177	0	3.81094	2.9232	0	-3.36707
	Total :	9394	6055	301	100	100	100

## Sheet: (C)Cell-comp
CELLULAR COMPONENT
		Abundance			Proportion (%)			Relat. Abund %
GO_ID	GO_description	M. incog	M. hapla	LGT	M. incog	M. hapla	LGT	LGT vs RKN
GO:0005576	extracellular region	69	49	17	2.21438	2.14442	28.8136	26.6342
GO:0005737	cytoplasm	182	141	8	5.84082	6.17068	13.5593	7.55357
GO:0005694	chromosome	73	57	5	2.34275	2.49453	8.47458	6.05594
GO:0005764	lysosome	8	6	2	0.256739	0.262582	3.38983	3.13017
GO:0005773	vacuole	6	5	1	0.192555	0.218818	1.69492	1.48923
GO:0005829	cytosol	17	14	1	0.545571	0.612691	1.69492	1.11578
GO:0005783	endoplasmic reticulum	47	43	1	1.50834	1.88184	1.69492	-0.000175798
GO:0005815	microtubule organizing center	0	1	0	0	0.0437637	0	-0.0218818
GO:0005615	extracellular space	0	3	0	0	0.131291	0	-0.0656455
GO:0005575	cellular_component	3	2	0	0.0962773	0.0875274	0	-0.0919023
GO:0000228	nuclear chromosome	5	3	0	0.160462	0.131291	0	-0.145877
GO:0005730	nucleolus	5	4	0	0.160462	0.175055	0	-0.167758
GO:0043226	organelle	8	2	0	0.256739	0.0875274	0	-0.172133
GO:0030313	cell envelope	6	4	0	0.192555	0.175055	0	-0.183805
GO:0030312	external encapsulating structure	6	4	0	0.192555	0.175055	0	-0.183805
GO:0005856	cytoskeleton	62	41	1	1.98973	1.79431	1.69492	-0.197105
GO:0005777	peroxisome	6	7	0	0.192555	0.306346	0	-0.24945
GO:0005635	nuclear envelope	13	10	0	0.417202	0.437637	0	-0.427419
GO:0016023	cytoplasmic membrane-bounded vesicle	18	11	0	0.577664	0.4814	0	-0.529532
GO:0005578	proteinaceous extracellular matrix	22	22	0	0.706033	0.962801	0	-0.834417
GO:0005794	Golgi apparatus	38	19	0	1.21951	0.83151	0	-1.02551
GO:0005654	nucleoplasm	41	28	0	1.31579	1.22538	0	-1.27059
GO:0005739	mitochondrion	68	39	0	2.18228	1.70678	0	-1.94453
GO:0005886	plasma membrane	89	64	0	2.85623	2.80088	0	-2.82855
GO:0005634	nucleus	454	316	6	14.57	13.8293	10.1695	-4.03015
GO:0005840	ribosome	156	105	0	5.00642	4.59519	0	-4.8008
GO:0043234	protein complex	312	242	3	10.0128	10.5908	5.08475	-5.21708
GO:0005622	intracellular	476	325	3	15.276	14.2232	5.08475	-9.66485
GO:0005623	cell	926	718	11	29.7176	31.4223	18.6441	-11.9259
	Total :	3116	2285	59	100	100	100
