# Supplementary material for: Contribution of Lateral Gene Transfers to the Genome Composition and Parasitic Ability of Root-Knot Nematodes
Source: PLoS One. 2012 Nov 30;7(11):e50875. doi: 10.1371/journal.pone.0050875 (PMC3511272; doi:10.1371/journal.pone.0050875)
Supplement: Table S6 — Genomic clusters of genes acquired via LGT in Meloidogyne incognita. This table lists the 161 genes present in 38 genomic clusters composed of at least 3 genes distant of less than 50 kb on a same scaffold. For each gene, the accession number is given, followed that the scaffold and genomic coordinates on the scaffold (columns 1–4). Presence of a Pfam protein domain and grouping in an OrthoMCL group are indicated in columns 5 and 6. In a given genomic cluster, a same OrthoMCL group is represented with a same color. The size (in number of genes) of every genomic cluster is given in the last column. (XLS) [file pone.0050875.s007.xls]

## Sheet: Feuil1
Gene	Scaffold	scaf-from	scaf-to	Family / Pfam	OrthoMCL Group	Cluster size
Minc05492	11	199354	200305	x		4
Minc05496	11	220663	222099	Metallophos
Minc05502	11	241388	243238	x	ORTHOMCL19807
Minc08541	11	272008	272832	x	ORTHOMCL26877
Minc00378	25	275315	276127	PL3	ORTHOMCL13964	3
Minc00379	25	276669	277386	PL3
Minc00380	25	279557	282415	PL3	ORTHOMCL13964
Minc00928	30	98893	101298	UPF57		3
Minc00929	30	101533	101995	UPF57
Minc00932a	30	110125	110928	UPF57
Minc08259	37	30387	32069	x	ORTHOMCL1470	4
Minc08257	37	43096	43961	x	ORTHOMCL1470
Minc08256	37	44649	46515	x	ORTHOMCL1470
Minc03345	37	92829	93493	x
Minc01503	53	65421	69526	DUF1768	ORTHOMCL16057	8
Minc01512	53	96318	100957	PL3	ORTHOMCL20772
Minc01513	53	102652	104725	PL3	ORTHOMCL20775
Minc01514	53	106509	108847	PL3	ORTHOMCL9762
Minc01515	53	109367	111322	PL3	ORTHOMCL9762
Minc01516	53	112696	113545	PL3
Minc01517	53	119799	121907	PL3	ORTHOMCL9762
Minc01522c	53	132956	153471	PL3
Minc03667	63	112300	120769	Phlebovirus_G2	ORTHOMCL7524	3
Minc12294	63	158283	160595	Phlebovirus_G2	ORTHOMCL7524
Minc12295	63	160723	162226	Phlebovirus_G2	ORTHOMCL7524
Minc12441	67	6651	8531	x	ORTHOMCL16060	3
Minc03721	67	50088	50527	x	ORTHOMCL19845
Minc03727	67	70255	70605	x	ORTHOMCL19844
Minc02319	69	145193	146457	x	ORTHOMCL9760	6
Minc02320	69	148250	149942	x	ORTHOMCL9760
Minc02321	69	154093	154897	x	ORTHOMCL9760
Minc02322	69	156257	157427	x	ORTHOMCL9760
Minc02324	69	161023	161238	x	ORTHOMCL9760
Minc02328a	69	172440	174884	x	ORTHOMCL19807
Minc09268	71	4542	8988	x		6
Minc09269	71	14699	14966	x	ORTHOMCL16060
Minc09275	71	34869	36014	DUF1768
Minc09530	71	86341	86556	TBP	ORTHOMCL12136
Minc09513	71	128545	129328	Vitamin B7, biotin BioB ? BATS
Minc09512	71	129403	130535	Vitamin B7, biotin BioB ?, Radical_SAM
Minc02560	85	26807	28203	x		7
Minc02569	85	65931	66357	zf-C3HC4	ORTHOMCL16054
Minc02570	85	67486	69940	zf-C3HC4	ORTHOMCL16054
Minc02579	85	107701	110384	x	ORTHOMCL13920
Minc02580	85	112401	113684	x
Minc02581	85	113762	116997	x	ORTHOMCL13920
Minc02583	85	120354	123235	x	ORTHOMCL13920
Minc03042	86	57678	58571	Histone	ORTHOMCL20881	3
Minc03058	86	104004	105189	x
Minc03065	86	135750	137530	CAF1
Minc06253	87	7472	8468	x	ORTHOMCL14002	4
Minc06255	87	12751	15759	x	ORTHOMCL12140
Minc06256	87	16681	18102	x	ORTHOMCL19756
Minc06258	87	23534	24872	x	ORTHOMCL12140
Minc06201	90	3655	5882	Pkinase	ORTHOMCL6995	16
Minc06202	90	8224	14426	Pkinase	ORTHOMCL6995
Minc06203	90	17509	20277	Pkinase	ORTHOMCL6995
Minc06205	90	25851	28609	x	ORTHOMCL7028
Minc06206	90	30751	33123	Pkinase	ORTHOMCL6995
Minc06208	90	39431	44457	Pkinase	ORTHOMCL6995
Minc06209	90	45410	48268	Pkinase	ORTHOMCL7028
Minc13907	90	100119	101117	x	ORTHOMCL26773
Minc13906	90	104065	105728	Pkinase	ORTHOMCL21158
Minc13905	90	106374	108462	Pkinase	ORTHOMCL16602
Minc13904	90	112240	114169	Pkinase	ORTHOMCL6995
Minc13900	90	123476	124545	Pkinase	ORTHOMCL26775
Minc13286	90	134664	136700	Pkinase	ORTHOMCL7028
Minc13285	90	139266	142387	Pkinase	ORTHOMCL6995
Minc13284	90	145170	151522	Pkinase	ORTHOMCL26775
Minc13283	90	154395	156287	Pkinase	ORTHOMCL7028
Minc07642	91	32292	36990	DUF889, OTU	ORTHOMCL11956	7
Minc07643	91	37792	39496	DUF889, OTU	ORTHOMCL11956
Minc07646	91	58278	65385	DUF889, OTU	ORTHOMCL11956
Minc07649	91	75816	83019	DUF889, OTU	ORTHOMCL11956
Minc07651	91	96107	96916	DUF889, OTU	ORTHOMCL11956
Minc09313	91	115064	115687	Peptidase_S1
Minc09314	91	119355	120318	PAZ	ORTHOMCL10679
Minc03283	101	10276	10651	x		3
Minc03286	101	27628	30326	GH5_2	ORTHOMCL8857
Minc03287	101	32850	36472	GH5_2	ORTHOMCL8857
Minc10987	120	42446	42929	EXPN; MIx14x6	ORTHOMCL9761	3
Minc10988	120	43754	44236	EXPN	ORTHOMCL9761
Minc10989	120	45017	45482	EXPN	ORTHOMCL9761
Minc06278	123	1862	3505	Phlebovirus_G2	ORTHOMCL7524	4
Minc06282	123	16147	18538	Phlebovirus_G2	ORTHOMCL7524
Minc06284	123	26847	28871	x	ORTHOMCL14022
Minc06289	123	48652	51597	PL3
Minc10305	127	6479	9936	x		5
Minc10308b	127	24923	28601	Proteasome
Minc14047	127	62433	66284	GH5_2	ORTHOMCL8857
Minc14048	127	68804	71637	GH5_2	ORTHOMCL8857
Minc11221	127	119656	121246	x
Minc08151	154	25108	27316	Lon_C		5
Minc08147	154	38724	40757	ThiS
Minc08144	154	50134	52630	UCH	ORTHOMCL26887
Minc11227	154	83647	85655	x	ORTHOMCL26816
Minc11235	154	119423	122127	DUF889
Minc04655	167	73330	74727	x		3
Minc04656	167	75288	76304	PITH	ORTHOMCL12050
Minc04661	167	103450	104704	PL3	ORTHOMCL16440
Minc08843	169	50488	51996	x	ORTHOMCL19756	5
Minc08845a	169	54366	56906	x	ORTHOMCL14002
Minc08846	169	61312	62975	x	ORTHOMCL12140
Minc08847	169	64655	66983	x	ORTHOMCL19756
Minc11678	169	82560	86206	PAP_RNA-bind, PAP-central	ORTHOMCL12142
Minc08112	170	11508	12613	Pkinase	ORTHOMCL7028	3
Minc08115	170	22354	23632	Pkinase	ORTHOMCL6995
Minc08116	170	25039	29114	Pkinase	ORTHOMCL7028
Minc05961	212	32897	38462	GT*_GT1	ORTHOMCL16556	4
Minc05962	212	39550	43264	GT*_GT1	ORTHOMCL16556
Minc05963	212	43925	45717	GT*_GT1
Minc05972	212	90101	91462	PL3	ORTHOMCL21091
Minc06065	213	51363	53796	PfkB		3
Minc06074	213	77514	77967	UCH
Minc06075	213	78075	78679	UCH
Minc07818	237	335	3185	PAP_RNA-bind, PAP-central	ORTHOMCL12142	4
Minc07820	237	8650	10476	AIG2
Minc07825	237	20029	20228	x
Minc07826b	237	20303	24506	Radical_SAM
Minc11829	245	40889	41905	FANCL_C	ORTHOMCL26800	3
Minc13767	245	85304	86828	FANCL_C	ORTHOMCL26800
Minc13768	245	88644	89001	EXPN
Minc07193	246	4804	10871	Lon_C	ORTHOMCL16013	3
Minc07197	246	23570	25121	x	ORTHOMCL16013
Minc07198	246	27272	28858	Lon_C	ORTHOMCL16013
Minc07762	264	40069	40927	dUTPase	ORTHOMCL26903	3
Minc07773	264	70499	71453	x	ORTHOMCL26900
Minc07774	264	72289	72681	x
Minc09037	300	25795	26540	Gln-synt_C	ORTHOMCL957	3
Minc09038	300	26597	27035	Gln-synt_C	ORTHOMCL957
Minc09039	300	27221	28041	Gln-synt_C	ORTHOMCL957
Minc09053	317	4171	5812	x	ORTHOMCL1470	4
Minc09058	317	25322	29554	x	ORTHOMCL1470
Minc09060	317	35122	35862	x	ORTHOMCL27031
Minc09061	317	36166	37638	E1-E2_ATPase
Minc09888	330	45749	48454	GH*_GH25		3
Minc09889	330	53754	55217	x	ORTHOMCL12140
Minc09890	330	57368	59534	x	ORTHOMCL12140
Minc13041	349	7638	9438	Pkinase	ORTHOMCL20739	3
Minc13046	349	34147	35939	x	ORTHOMCL13976
Minc15608	349	41944	45216	x	ORTHOMCL13976
Minc10235	366	3853	5212	x	ORTHOMCL16009	3
Minc10239	366	21724	22476	Pkinase	ORTHOMCL7028
Minc10242	366	30727	32291	Pkinase	ORTHOMCL7028
Minc11768	459	9893	10417	zf-C3HC4		3
Minc11770	459	14859	16590	PL3
Minc11772	459	25260	27304	PL3	ORTHOMCL20622
Minc13401	537	12177	12787	x	ORTHOMCL26773	5
Minc13402	537	15741	17410	Pkinase	ORTHOMCL21158
Minc13403	537	19512	22832	Pkinase	ORTHOMCL16602
Minc13404	537	28231	29833	Pkinase
Minc13407	537	36638	38193	Pkinase	ORTHOMCL16602
Minc15196	775	2256	3882	x	ORTHOMCL16504	3
Minc15197	775	4238	5066	WD4x	ORTHOMCL2992
Minc15198	775	5194	7916	WD4x	ORTHOMCL2992
Minc15672	776	13953	14271	x	ORTHOMCL1470	3
Minc15673	776	14411	15761	x	ORTHOMCL1470
Minc15675	776	20525	22185	x	ORTHOMCL1470
Minc15388	840	12227	12660	RRM_1	ORTHOMCL14007	3
Minc15391	840	19112	19583	RRM_1	ORTHOMCL14007
Minc15392	840	22475	22948	RRM_1	ORTHOMCL14007
