# Supplementary material for: Contribution of Lateral Gene Transfers to the Genome Composition and Parasitic Ability of Root-Knot Nematodes
Source: PLoS One. 2012 Nov 30;7(11):e50875. doi: 10.1371/journal.pone.0050875 (PMC3511272; doi:10.1371/journal.pone.0050875)
Supplement: Table S7 — Putative donors of LGT in root-knot nematodes. Putative donors for the 141 distinct LGT cases inferred by phylogenetic analysis are listed in this table. Accession numbers of the reference proteins are given in the first column. The nature of the phylogenetic support for LGT is indicated in column 2. Species present in the donor clade are listed in column 3. A simplified taxonomy presenting the clades donor species belong to is given in column 4. Taxonomic division (Bacteria, Fungi, Protist, Plant or Archae) is indicated in the last column. (XLSX) [file pone.0050875.s008.xlsx]

## Sheet: Feuil1
Accession Number	Phylogenet. Support	Candidate donor	Taxonomy	Taxonomy short
Minc18650	A+B	XANTHOMONAS CAMPESTRIS, XANTHOMONAS ORYZAE, XANTHOMONAS AXONOPODIS, CELLVIBRIO JAPONICUS, ERWINIA CHRYSANTHEMI, DICKEYA DADANTII	BACTERIA: GAMMAPROTEOBACTERIA	BACTERIA
Minc09888	A+B	TETRAHYMENA THERMOPHILA	PROTIST: CILIOPHORA	PROTIST
Minc09178	A+B	CATENULISPORA ACIDIPHILA, CELLULOSILYTICUM RUMINICOLA, AEROMONAS PUNCTATA, CLOSTRIDIUM THERMOCELLUM, GEOBACILLUS SP, CLOSTRIDIUM PAPYROSOLVENS, CLOSTRIDIUM CELLULOLYTICUM, BACILLUS SUBTILIS, BACILLUS PUMILUS, BACILLUS AMYLOLIQUEFACIENS, CLOSTRIDIUM ACETOBUTYLICUM, STREPTOMYCES SCABIEI, STREPTOMYCES SVICEUS	BACTERIA: FIRMICUTES, CLOSTRIDIALES, GAMMAPROTEOBACTERIA, ACTINOMYCETALES	BACTERIA
Minc13284	A+B	RHODOPIRELLULA BALTICA	BACTERIA: PLANCTOMYCETES	BACTERIA
Mh_Contig0:145049..145261	A+B	THALASSIOSIRA PSEUDONANA	PROTIST: STRAMENOPILES	PROTIST
Mh_Contig1230:2564..6337	A+B	SINORHIZOBIUM MELILOTI, RHIZOBIUM SP, SINORHIZOBIUM MEDICAE, NOVOSPHINGOBIUM AROMATICIVORANS, BEIJERINCKIA INDICA	BACTERIA: RHIZOBIALES, ALPHAPROTEOBACTERIA	BACTERIA
Mh_Contig1342:13027..14793	A+B	POLYSPHONDYLIUM PALLIDUM	PROTIST: AMOEBOZOA	PROTIST
Mh_Contig1481:10006..11247	A+B	STAPHYLOCOCCUS PHAGE K	VIRUS: PHAGE	BACTERIA
Mh_Contig222:75571..76264	A+B	ROSEOBACTER LITORALIS, ROSEOBACTER DENITRIFICANS, CITREICELLA SP, ROSEOVARIUS SP, RUEGERIA SP	BACTERIA: Rhodobacterales (Alphaproteobacteria)	BACTERIA
Mh_Contig2450:6416..9224	A+B	METHANOPYRUS KANDLERI	ARCHAEA: METHANOPYRI	ARCHAEA
Mh_Contig2499:3012..6351	A+B	PSEUDOVIBRIO SP, LABRENZIA AGGREGATA, LABRENZIA ALEXANDRII	BACTERIA: Rhodobacterales (Alphaproteobacteria)	BACTERIA
Mh_Contig2789:1070..3530	A+B	TETRAHYMENA THERMOPHILA	PROTIST: CILIOPHORA	PROTIST
Mh_Contig2898:574..1741	A+B	TRICHOMONAS VAGINALIS	PROTIST: TRICHOMONADIDA	PROTIST
Minc01316	A+B	PLASMODIUM FALCIPARUM	PROTIST: APICOMPLEXA	PROTIST
Minc01615	A+B	PROCHLOROCOCCUS MARINUS, DICKEYA DADANTII, PLASMODIUM BERGHEI	BACTERIA: CYANOBACTERIA, GAMMAPROTEOBACTERIA | PROTIST: APICOMPLEXA	BACTERIA
Minc01946	A+B	ENTAMOEBA HISTOLYTICA	PROTIST: AMOEBOZOA	PROTIST
Minc02905	A+B	CHLAMYDOMONAS REINHARDTII	VIRIDIPLANTAE: CHLOROPHYTA	PLANT
Minc03345	A+B	STREPTOCOCCUS AGALACTIAE	BACTERIA: FIRMICUTES	BACTERIA
Minc04989	A+B	PHYTOPHTHORA INFESTANS	PROTIST: OOMYCETE	PROTIST
Minc06015	A+B	METHYLACIDIPHILUM INFERNORUM	BACTERIA: VERRUCOMICROBIA	BACTERIA
Minc07982a	A+B	TOXOPLASMA GONDII	PROTIST: APICOMPLEXA	PROTIST
Minc09512	A+B	NEORICKETTSIA RISTICII, NEORICKETTSIA SENNETSU	BACTERIA: ALPHAPROTEOBACTERIA	BACTERIA
Minc09513	A+B	RICKETTSIA FELIS, RICKETTSIA ENDOSYMBIONT OF IXODES SCAPULARIS	BACTERIA: ALPHAPROTEOBACTERIA	BACTERIA
Minc10639	A+B	COPRINOPSIS CINEREA, VERTICILLIUM ALBO-ATRUM, GIBBERELLA ZEAE, NECTRIA HAEMATOCOCCA, CHAETOMIUM GLOBOSUM, STREPTOMYCES COELICOLOR, STREPTOMYCES GRISEOFLAVUS, STREPTOMYCES SVICEUS, STREPTOMYCES GHANAENSIS, STREPTOMYCES FLAVOGRISEUS, STREPTOMYCES HYGROSCOPICUS, THERMOMONOSPORA CURVATA, NOCARDIOPSIS DASSONVILLEI, MICROMONOSPORA AURANTIACA, ACTINOSYNNEMA MIRUM	FUNGI: DIKARYA | BACTERIA: ACTINOMYCETALES	BACTERIA + FUNGI
Minc11235	A+B	ORYZA SATIVA JAPONICA	VIRIDIPLANTAE: STREPTOPHYTA	PLANT
Minc11846	A+B	AROMATOLEUM AROMATICUM	BACTERIA: BETAPROTEOBACTERIA	BACTERIA
Minc11909	A+B	BABESIA BOVIS, THEILERIA ANNULATA, THEILERIA PARVA	PROTIST: APICOMPLEXA	PROTIST
Minc14782	A+B	METHYLOBACTERIUM NODULANS, METHYLOBACTERIUM POPULI, SINORHIZOBIUM MELILOTI, SINORHIZOBIUM MEDICAE, RHIZOBIUM SP, HYPHOMICROBIUM DENITRIFICANS, METHYLOBACTERIUM EXTORQUENS, METHYLOBACTERIUM EXTORQUENS, METHYLOBACTERIUM CHLOROMETHANICUM, METHYLOBACTERIUM EXTORQUENS, XANTHOBACTER AUTOTROPHICUS, AZORHIZOBIUM CAULINODANS, DESULFOVIBRIO MAGNETICUS, DESULFOVIBRIO SP	BACTERIA: RHIZOBIALES, DELTAPROTEOBACTERIA	BACTERIA
Minc15197	A+B	PHYSCOMITRELLA PATENS, PICEA SITCHENSIS, DICTYOSTELIUM DISCOIDEUM, THEILERIA ANNULATA, THEILERIA PARVA, USTILAGO MAYDIS	PROTIST: AMOEBOZOA, APICOMPLEXA | FUNGI: BASIDIOMYCOTA | VIRIDIPLANTAE: EMBRYOPHITA	PROTIST + FUNGI + PLANT
Minc16424	A+B	BURKHOLDERIA CENOCEPACIA, BURKHOLDERIA CENOCEPACIA, RALSTONIA SOLANACEARUM, BURKHOLDERIA AMBIFARIA, BURKHOLDERIA UBONENSIS, BURKHOLDERIA AMBIFARIA, BURKHOLDERIA SP, AGROBACTERIUM RADIOBACTER, VARIOVORAX PARADOXUS	BACTERIA: BURKHOLDERIALES (BETAPROTEOBACTERIA), RHIZOBIALES (ALPHAPROTEOBACTERIA)	BACTERIA
Minc18140	A+B	ARABIDOPSIS THALIANA	VIRIDIPLANTAE: STREPTOPHYTA	PLANT
Minc18407	A+B	CLOSTRIDIUM METHYLPENTOSUM, SEBALDELLA TERMITIDIS, LEPTOTRICHIA BUCCALIS, LEPTOTRICHIA HOFSTADII, CATENIBACTERIUM MITSUOKAI	BACTERIA: FIRMICUTES, FUSOBACTERIA	BACTERIA
Minc04192a	A+B	RHIZOBIUM LEGUMINOSARUM, RHIZOBIUM ETLI, AGROBACTERIUM RADIOBACTER, AGROBACTERIUM VITIS, AGROBACTERIUM TUMEFACIENS, SINORHIZOBIUM MELILOTI, SINORHIZOBIUM MEDICAE, RHIZOBIUM SP, HOEFLEA PHOTOTROPHICA, CHELATIVORANS, MESORHIZOBIUM LOTI, MESORHIZOBIUM OPPORTUNISTUM, OCHROBACTRUM INTERMEDIUM, BRUCELLA MELITENSIS, BRUCELLA CETI, BRUCELLA SP, BRUCELLA SUIS, BRUCELLA MELITENSIS, BRUCELLA OVIS, BRUCELLA …	BACTERIA: RHIZOBIALES	BACTERIA
Minc07726	A+B	OPITUTACEAE BACTERIUM	BACTERIA: VERRUCOMICROBIA	BACTERIA
Minc14977	A+B	BRADYRHIZOBIUM SP	BACTERIA: ALPHAPROTEOBACTERIA	BACTERIA
Mh_Contig1886:4771..7593	A+B	THERMOANAEROBACTERIUM, THERMOSULFURIGENES YERSINIA, FREDERIKSENII, YERSINIA ENTEROCOLITICA, YERSINIA BERCOVIERI, YERSINIA MOLLARETII, YERSINIA INTERMEDIA, ERWINIA CHRYSANTHEMI, DICKEYA ZEAE, DICKEYA DADANTII, DICKEYA DADANTII, RALSTONIA SOLANACEARUM, RALSTONIA SOLANACEARUM, PSEUDOMONAS PUTIDA, PSEUDOMONAS FLUORESCENS, PECTOBACTERIUM CAROTOVORUM, PECTOBACTERIUM CAROTOVORUM, AROTOVORUM, PECTOBACTER…	BACTERIA: FIRMICUTES, GAMMAPROTEOBACTERIA, BETAPROTEOBACTERIA	BACTERIA
Minc02701	A+B	CLOSTRIDIUM CELLULOVORANS, BACILLUS THURINGIENSIS, BACILLUS CEREUS, BACILLUS THURINGIENSIS, BACILLUS CEREUS, BACILLUS WEIHENSTEPHANENSIS, BACILLUS MYCOIDES, BACILLUS PSEUDOMYCOIDES, BACILLUS CYTOTOXICUS	BACTERIA: FIRMICUTES	BACTERIA
Minc09678b	A+B	OCHROBACTRUM INTERMEDIUM, OCHROBACTRUM ANTHROPI, BRUCELLA CETI, BRUCELLA ABORTUS, BRUCELLA SUIS, BRUCELLA SP, BRUCELLA OVIS, BRUCELLA ABORTUS, BRUCELLA MELITENSIS	BACTERIA: ALPHAPROTEOBACTERIA (BRUCELLACEAE)	BACTERIA
Minc14296	A+B	DESULFOVIBRIO MAGNETICUS, DESULFOVIBRIO SP, HYPHOMICROBIUM DENITRIFICANS, AZORHIZOBIUM CAULINODANS, XANTHOBACTER AUTOTROPHICUS, METHYLOBACTERIUM NODULANS, METHYLOBACTERIUM EXTORQUEN, METHYLOBACTERIUM CHLOROMETHANICUM, METHYLOBACTERIUM POPULI, SINORHIZOBIUM MEDICAE, SINORHIZOBIUM MELILOTI, RHIZOBIUM SP	BACTERIA: RHIZOBIALES, DELTAPROTEOBACTERIA	BACTERIA
Minc14603	A+B	ARCOBACTER BUTZLERI, NAUTILIA PROFUNDICOLA, CAMINIBACTER MEDIATLANTICUS	BACTERIA: EPSILONPROTEOBACTERIA	BACTERIA
Minc14982	A+B	MAGNETOCOCCUS SP, SYNECHOCOCCUS SP, LYNGBYA SP, MICROCOLEUS CHTHONOPLASTES, CYANOTHECE SP, RICHODESMIUM ERYTHRAEUM, GLOEOBACTER VIOLACEUS, HALIANGIUM OCHRACEUM, MYXOCOCCUS XANTHUS, ANAEROMYXOBACTER SP, PELOBACTER PROPIONICUS, GEOBACTER LOVLEYI, GEOBACTER SULFURREDUCENS, GEOBACTER METALLIREDUCENS, GEOBACTER BEMIDJIENSIS, GEOBACTER SP, DESULFUROMONAS ACETOXIDANS, DESULFATIBACILLUM ALKENIVORANS, THE…	BACTERIA: CYANOBACTERIA, PROTEOBACTERIA, AQUIFACE, FIRMICUTES, NITROSPIRAE	BACTERIA
Minc18566	A+B	ORYZA SATIVA INDICA GROUP, SORGHUM BICOLOR, PHYLLOSTACHYS EDULIS	VIRIDIPLANTAE: POACEA	PLANT
Minc10892	A+B	XANTHOBACTER AUTOTROPHICUS, AZORHIZOBIUM CAULINODANS	BACTERIA: RHIZOBIALES (ALPHAPROTEOBACTERIA)	BACTERIA
Mh_Contig280:9882..11674	A+B	AZORHIZOBIUM CAULINODANS, XANTHOBACTER AUTOTROPHICUS	BACTERIA: RHIZOBIALES (ALPHAPROTEOBACTERIA)	BACTERIA
Minc10889	A+B	XANTHOBACTER AUTOTROPHICUS, AZORHIZOBIUM CAULINODANS	BACTERIA: RHIZOBIALES (ALPHAPROTEOBACTERIA)	BACTERIA
Mh_Contig1342:1068..1343	A+B	PARAMECIUM TETRAURELIA, POLYSPHONDYLIUM PALLIDUM, MONOSIGA BREVICOLLIS	PROTIST: MONOSIGA, AMOEBOZOA, CILIOPHORA	PROTIST
Mh_Contig2083:3453..4301	A+B	THERMOCOCCUS GAMMATOLERANS	ARCHAEA: THERMOCOCCI	ARCHAEA
Mh_Contig280:68002..69512	A+B	PICHIA PASTORIS	FUNGI: DIKARYA	FUNGI
Minc02580	A+B	CYANOTHECE SP	BACTERIA: CYANOBACTERIA	BACTERIA
Minc09268	A+B	PLANCTOMYCES MARIS, PSEUDOMONAS SYRINGAE	BACTERIA: PLANCTOMYCETES, GAMMAPROTEOBACTERIA	BACTERIA
Minc10191	A+B	PARAMECIUM TETRAURELIA	PROTIST: CILIOPHORA	PROTIST
Minc15221	A+B	BACILLUS CEREUS, BACILLUS THURINGIENSIS, BACILLUS CEREUS, ALKALIPHILUS METALLIREDIGENS, BACILLUS LICHENIFORMIS, CLOSTRIDIUM BEIJERINCKII, BACILLUS CLAUSII, BACILLUS CEREUS, BACILLUS THURINGIENSIS	BACTERIA: FIRMICUTES	BACTERIA
Minc00365	A	LEISHMANIA MAJOR, CRYPTOSPORIDIUM PARVUM, CRYPTOSPORIDIUM HOMINIS	PROTIST: APICOMPLEXA, KINETOPLASTIDA	PROTIST
Mh_Contig135:12433..14112	A	DESULFOVIBRIO DESULFURICANS	BACTERIA: DELTAPROTEOBACTERIA	BACTERIA
Mh_Contig1358:39..3354	A	RHIZOBIUM ETLI, RHIZOBIUM SP, RHIZOBIUM LEGUMINOSARUM, AGROBACTERIUM TUMEFACIENS	BACTERIA: RHIZOBIUM / AGROBACTERIUM	BACTERIA
Mh_Contig170:31707..33369	A	PLASMODIUM FALCIPARUM	PROTIST: APICOMPLEXA	PROTIST
Mh_Contig293:21730..23424	A	KLUYVEROMYCES LACTIS	FUNGI: DIKARYA	FUNGI
Mh_Contig364:2402..4508	A	TETRAHYMENA THERMOPHILA	PROTIST: CILIOPHORA	PROTIST
Mh_Contig392:33512..34604	A	PARAMECIUM TETRAURELIA	PROTIST: CILIOPHORA	PROTIST
Mh_Contig611:21797..23320	A	VESICOMYA SP MT-I SYMBIONT, VESICOMYA CORDATA GILL SYMBIONT, VESICOMYA SP MT-III SYMBIONT	BACTERIA: GAMMAPROTEOBACTERIA	BACTERIA
Minc00968	A	DICTYOSTELIUM DISCOIDEUM	PROTIST: AMOEBOZOA	PROTIST
Minc01278	A	RICKETTSIA FELIS	BACTERIA: ALPHAPROTEOBACTERIA	BACTERIA
Minc07328	A	MEIOTHERMUS RUBER, ANAEROMYXOBACTER SP, SORANGIUM CELLULOSUM, PELOBACTER PROPIONICUS, GEOBACTER BEMIDJIENSIS, GEOBACTER SP, VULARCULA BERMUDENSIS, RUMINOCOCCUS OBEUM, EUBACTERIUM RECTALE, CLOSTRIDIUM HATHEWAYI, CLOSTRIDIALES BACTERIUM, CLOSTRIDIUM BOLTEAE, LEPTOSPIRILLUM SP, LEPTOSPIRILLUM RUBARUM, MYCOPLASMA CONJUNCTIVAE, PAENIBACILLUS SP	BACTERIA: FIRMICUTES, NITROSPIRAE, TENERICUTES, DEINOCOCCI, DELTAPROTEOBACTERIA	BACTERIA
Minc10330	A	STAPHYLOCOCCUS PHAGE K, CLOSTRIDIUM BEIJERINCKII, CLOSTRIDIUM BOTULINUM, CLOSTRIDIUM PERFRINGENS, PROVIDENCIA RETTGERI, NAEGLERIA GRUBERI, MICROMONOSPORA AURANTIACA, BREVIBACILLUS BREVIS, FAECALIBACTERIUM PRAUSNITZII, BACTEROIDES CAPILLOSUS	PROTIST: HETEROLOBOSEA | BACTERIA: FIRMICUTES, GAMMAPROTEOBACTERIA, ACTINOBACTERIA | VIRUS: PHAGE	BACTERIA + PROTIST
Minc13314	A	PHYTOPHTHORA INFESTANS	PROTIST: OOMYCETE	PROTIST
Minc14976	A	PLASMODIUM KNOWLESI	PROTIST: APICOMPLEXA	PROTIST
Minc17772	A	STREPTOMYCES SP, CATENULISPORA ACIDIPHILA	BACTERIA: ACTINOBACTERIA	BACTERIA
Mh_Contig1353:17897..19181	A	PARAMECIUM TETRAURELIA	PROTIST: CILIOPHORA	PROTIST
Mh_Contig1429:11169..12646	A	MYCOPLASMA CAPRICOLUM	BACTERIA: TENERICUTES	BACTERIA
Mh_Contig1483:5311..5864	A	FIBROBACTER SUCCINOGENES, STAPHYLOCOCCUS PHAGE K	BACTERIA: FIBROBACTERES | VIRUS: PHAGE	BACTERIA
Mh_Contig1494:30234..31181	A	LODDEROMYCES ELONGISPORUS	FUNGI: DIKARYA	FUNGI
Mh_Contig1558:7790..8628	A	TALAROMYCES STIPITATUS, PENICILLIUM MARNEFFEI, ASPERGILLUS FUMIGATUS, ASPERGILLUS FLAVUS, SCLEROTINIA SCLEROTIORUM, BOTRYOTINIA FUCKELIANA, CHAETOMIUM GLOBOSUM, ASPERGILLUS ACULEATUS, PYRENOPHORA TRITICI-REPENTIS, PHAEOSPHAERIA NODORUM, NECTRIA HAEMATOCOCCA, ASPERGILLUS CLAVATUS, ASPERGILLUS ORYZAE, PENICILLIUM CHRYSOGENUM, ASPERGILLUS NIDULANS, NEOSARTORYA FISCHERI, ASPERGILLUS FUMIGATUS, ASPERG…	FUNGI: DIKARYA	FUNGI
Mh_Contig158:18359..22029	A	THALASSIOSIRA PSEUDONANA, PARAMECIUM TETRAURELIA, SORGHUM BICOLOR	PROTIST: CILIOPHORA, STRAMENOPILES | VIRIDIPLANTAE: STREPTOPHYTA	PROTIST + PLANT
Mh_Contig1647:12873..14508	A	EUBACTERIUM VENTRIOSUM, PAENIBACILLUS SP	BACTERIA: FIRMICUTES	BACTERIA
Mh_Contig180:4847..5405	A	MYCOBACTERIUM MARINUM, PENICILLIUM MARNEFFEI	BACTERIA: ACTINOBACTERIA | FUNGI: DIKARYA	BACTERIA + FUNGI
Mh_Contig1856:1160..2712	A	TRICHOMONAS VAGINALIS	PROTIST: TRICHOMONADIDA	PROTIST
Mh_Contig1879:4116..5961	A	RICKETTSIELLA GRYLLI, PSEUDOMONAS SYRINGAE , XANTHOMONAS ALBILINEANS, XYLELLA FASTIDIOSA, WOLBACHIA ENDOSYMBIONT OF CULEX QUINQUEFASCIATUS, FRANKIA SP, NOSTOC PUNCTIFORME, ARTHROSPIRA MAXIMA, ARTHROSPIRA PLATENSIS, PARACA LYNGBYA, SPIROSOMA LINGUALE, ESCHERICHIA COLI, SHIGELLA FLEXNERI, SHIGELLA DYSENTERIAE, KORDIA ALGICIDA, MARINOMONAS SP	BACTERIA: PROTEOBACTERIA, CYANOBACTERIA, ACTINOBACTERIA, BACTEROIDETES	BACTERIA
Mh_Contig1905:330..998	A	STREPTOMYCES LAVENDULAE, ACTINOSYNNEMA MIRUM, POLYSPHONDYLIUM PALLIDUM, AMYCOLATOPSIS MEDITERRANEI	BACTERIA: ACTINOBACTERIA | PROTIST: AMOEBOZOA	BACTERIA + PROTIST
Mh_Contig2102:3683..4866	A	SULFOLOBUS TOKODAII, SULFOLOBUS ISLANDICUS, SULFOLOBUS SOLFATARICUS	ARCHEAE: THERMOPROTEI	ARCHAEA
Mh_Contig223:33854..34905	A	METHYLOCELLA SILVESTRIS, METHYLOBACTERIUM RADIOTOLERANS, METHYLOBACTERIUM EXTORQUENS, METHYLOBACTERIUM POPULI, METHYLOBACTERIUM SP, METHYLOBACTERIUM NODULANS, CHELATIVORANS SP, RALSTONIA EUTROPHA, NITROBACTER WINOGRADSKYI, RHIZOBIUM LEGUMINOSARUM, RHIZOBIUM ETLI, RHIZOBIUM LEGUMINOSARUM, RHIZOBIUM SP, MESORHIZOBIUM OPPORTUNISTUM, SPHINGOMONAS SP, ERYTHROBACTER SP, RHODOMICROBIUM VANNIELII, CUPRIA…	BACTERIA: ALPHAPROTEOBACTERIA, BETAPROTEOBACTERIA, GAMMAPROTEOBACTERIA, DELTAPROTEOBACTERIA, CYANOBACTERIA, VERRUCOMICROBIA	BACTERIA
Mh_Contig2254:3657..5652	A	ENTAMOEBA HISTOLYTICA	PROTIST: AMOEBOZOA	PROTIST
Mh_Contig2271:10462..11039	A	POLYSPHONDYLIUM PALLIDUM, ORYZA SATIVA JAPONICA, VIBRIO CHOLERAE	PROTIST: AMOEBOZOA | VIRIDIPLANTAE: STREPTOPHYTA | BACTERIA: GAMMAPROTEOBACTERIA	BACTERIA + PROTIST + PLANT
Mh_Contig239:30337..30933	A	ASPERGILLUS ORYZAE, ASPERGILLUS FLAVUS	FUNGI: DIKARYA	FUNGI
Mh_Contig2575:2849..3583	A	PECTOBACTERIUM CAROTOVORUM, SHEWANELLA WOODYI, LABRENZIA AGGREGATA	BACTERIA: GAMMAPROTEOBACTERIA, ALPHAPROTEOBACTERIA	BACTERIA
Mh_Contig2730:2805..5956	A	RICKETTSIA FELIS, MARINOMONAS SP, LEPTOSPIRA INTERROGANS, LEPTOSPIRA INTERROGANS, CANDIDATUS KORIBACTER, VERSATILIS ELLIN, ACIDOBACTERIUM CAPSULATUM, MOORELLA THERMOACETICA, CHRYSEOBACTERIUM GLEUM, BACTEROIDES SP, BACTEROIDES FRAGILIS, BACTEROIDES EGGERTHII, BACTEROIDES STERCORIS, BACTEROIDES UNIFORMIS, BACTEROIDES COPROCOLA, BACTEROIDES PLEBEIUS, FLAVOBACTERIA BACTERIUM, FLAVOBACTERIUM PSYCHROPH…	BACTERIA: ACIDOBACTERIA, PROTEOBACTERIA, BACTEROIDETES, SPIROCHAETES, FIRMICUTES	BACTERIA
Mh_Contig3141:1200..2289	A	TRICHOMONAS VAGINALIS, CHLOROBIUM LIMICOLA, CHLOROBIUM PHAEOBACTEROIDES	PROTIST: TRICHOMONADIDA | BACTERIA: CHLOROBIA	BACTERIA + PROTIST
Mh_Contig462:8264..8510	A	GAMMA PROTEOBACTERIUM, GRAMELLA FORSETII, PSYCHROFLEXUS TORQUIS	BACTERIA: BACTEROIDETES, GAMMAPROTEOBACTERIA	BACTERIA
Mh_Contig498:37206..40167	A	NAEGLERIA GRUBERI	PROTIST: HETEROLOBOSEA	PROTIST
Mh_Contig790:11104..12567	A	ACTINOSYNNEMA MIRUM, CRYPTOCOCCUS NEOFORMANS	BACTERIA: ACTINOBACTERIA | FUNGI: DIKARYA	BACTERIA + FUNGI
Mh_Contig820:5007..8235	A	PROCHLOROCOCCUS MARINUS	BACTERIA: CYANOBACTERIA	BACTERIA
Minc00058	A	TETRAHYMENA THERMOPHILA	PROTIST: CILIOPHORA	PROTIST
Minc00379	A	FRANKIA SP, STREPTOMYCES HYGROSCOPICUS, STREPTOMYCES VIRIDOCHROMOGENES, STREPTOMYCES GHANAENSIS, STREPTOMYCES, GRISEOFLAVUS, STREPTOMYCES SCABIEI	BACTERIA: ACTINOMYCETALES	BACTERIA
Minc00665	A	SCLEROTINIA SCLEROTIORUM, SCLEROTINIA SCLEROTIORUM, BOTRYOTINIA FUCKELIANA, BOTRYOTINIA FUCKELIANA, MYCOSPHAERELLA GRAMINICOLA, MICROSPORUM CANIS, UNCINOCARPUS REESII, COCCIDIOIDES IMMITIS, ASPERGILLUS NIDULANS, ASPERGILLUS NIGER, TALAROMYCES STIPITATUS, PENICILLIUM MARNEFFEI, AJELLOMYCES DERMATITIDIS, PARACOCCIDIOIDES BRASILIENSIS, AJELLOMYCES CAPSULATUS, VERTICILLIUM ALBO-ATRUM, MONILIOPHTHORA …	FUNGI: DIKARYA	FUNGI
Minc00808	A	VITIS VINIFERA	VIRIDIPLANTAE: STREPTOPHYTA	PLANT
Minc00928	A	PODOSPORA ANSERINA	FUNGI: DIKARYA	FUNGI
Minc02319	A	CHLAMYDOMONAS REINHARDTII	VIRIDIPLANTAE: CHLOROPHYTA	PLANT
Minc02328a	A	CHLAMYDOMONAS REINHARDTII	VIRIDIPLANTAE: CHLOROPHYTA	PLANT
Minc02473	A	DICTYOSTELIUM DISCOIDEUM, TETRAHYMENA THERMOPHILA	PROTIST: AMOEBOZOA, CILIOPHORA	PROTIST
Minc02581	A	PARAMECIUM TETRAURELIA, ARABIDOPSIS THALIANA	PROTIST: CILIOPHORA | VIRIDIPLANTAE: STREPTOPHYTA	PROTIST + PLANT
Minc03761	A	TETRAHYMENA THERMOPHILA, PICEA SITCHENSIS	PROTIST: CILIOPHORA | VIRIDIPLANTAE: STREPTOPHYTA	PROTIST + PLANT
Minc04115	A	NEUROSPORA CRASSA, TALAROMYCES STIPITATUS, PENICILLIUM MARNEFFEI, ASPERGILLUS TERREUS, ASPERGILLUS ORYZAE, ASPERGILLUS FLAVUS, NEOSARTORYA FISCHERI, ASPERGILLUS CLAVATUS, ASPERGILLUS NIDULANS, UNCINOCARPUS REESII, COCCIDIOIDES IMMITIS, COCCIDIOIDES POSADASII, DELTA SOWGP	FUNGI: DIKARYA	FUNGI
Minc04352	A	SCHIZOSACCHAROMYCES POMBE	FUNGI: DIKARYA	FUNGI
Minc04880	A	TRYPANOSOMA CRUZI, LEISHMANIA INFANTUM, LEISHMANIA MAJOR	PROTIST: TRYPANOSOMATIDAE	PROTIST
Minc05401	A	TRICHOMONAS VAGINALIS	PROTIST: TRICHOMONADIDA	PROTIST
Minc06923	A	ENTAMOEBA DISPAR, ENTAMOEBA HISTOLYTICA	PROTIST: AMOEBOZOA	PROTIST
Minc07485	A	PHYTOPHTHORA INFESTANS	PROTIST: OOMYCETE	PROTIST
Minc07826b	A	PICHIA PASTORIS, OSTREOCOCCUS LUCIMARINUS, OSTREOCOCCUS TAURI	VIRIDIPLANTAE: CHLOROPHYTA | FUNGI: DIKARYA	PLANT + FUNGI
Minc08077	A	FRANKIA SP, FRANKIA ALNI, LEGIONELLA PNEUMOPHILA, LEGIONELLA PNEUMOPHILA, LEGIONELLA PNEUMOPHILA, MORITELLA SP, SHEWANELLA SEDIMINIS, MARINOMONAS SP, MARINE GAMMA PROTEOBACTERIUM, JANIBACTER SP, BREVIBACTERIUM LINENS, PSEUDOMONAS SP, PSEUDOMONAS AERUGINOSA, KINEOCOCCUS RADIOTOLERANS, MYCOBACTERIUM GILVUM, MYCOBACTERIUM SP, NOCARDIOIDES SP, MYCOBACTERIUM TUBERCULOSIS, STREPTOMYCES SP, STREPTOMYCES…	BACTERIA: PROTEOBACTERIA, FIRMICUTES, ACTINOBACTERIA, CFB GROUP BACTERIA, GNS BACTERIA, HIGH GC GRAM+ | VIRIDIPLANTAE: STREPTOPHYTA	BACTERIA + PLANT
Minc08144	A	PHYTOPHTHORA INFESTANS, YARROWIA LIPOLYTICA	PROTIST: OOMYCETE | FUNGI: DIKARYA	PROTIST + FUNGI
Minc08671	A	TRICHOPLAX ADHAERENS	PLACOZOA	PLACOZOA
Minc09010	A	TOXOPLASMA GONDII	PROTIST: APICOMPLEXA	PROTIST
Minc09221	A	DEBARYOMYCES HANSENII	FUNGI: DIKARYA	FUNGI
Minc09970	A	PARAMECIUM TETRAURELIA	PROTIST: CILIOPHORA	PROTIST
Minc10536	A	VARIOVORAX PARADOXUS, STREPTOMYCES SVICEUS, STREPTOMYCES SCABIEI, STREPTOMYCES SP, XANTHOMONAS CAMPESTRIS, BURKHOLDERIA PHYMATUM, BURKHOLDERIA XENOVORANS, BURKHOLDERIA SP, BURKHOLDERIA PHYTOFIRMANS, BURKHOLDERIA GRAMINIS, BURKHOLDERIA OKLAHOMENSIS, BURKHOLDERIA THAILANDENSIS, BURKHOLDERIA PSEUDOMALLEI, BURKHOLDERIA MALLEI, BURKHOLDERIA PSEUDOMALLEI, BURKHOLDERIA UBONENSIS, BURKHOLDERIA MULTIVORAN…	BACTERIA: BETAPROTEOBACTERIA	BACTERIA
Minc10987	A	CANDIDA DUBLINIENSIS, CANDIDA ALBICANS, LACCARIA BICOLOR, ACTINOSYNNEMA MIRUM, AMYCOLATOPSIS MEDITERRANEI, STREPTOMYCES LAVENDULAE, POLYSPHONDYLIUM PALLIDUM, DICTYOSTELIUM DISCOIDEUM	BACTERIA: ACTINOBACTERIA | FUNGI: DIKARYA | PROTIST: AMOEBOZOA	BACTERIA + PROTIST + FUNGI
Minc11468	A	DICTYOSTELIUM DISCOIDEUM, AMYCOLATOPSIS MEDITERRANEI, POLYSPHONDYLIUM PALLIDUM, ACTINOSYNNEMA MIRUM, STREPTOMYCES LAVENDULAE	PROTIST: AMOEBOZOA | BACTERIA: ACTINOBACTERIA	BACTERIA + PROTIST
Minc12441	A	CHLAMYDOMONAS REINHARDTII, NECTRIA HAEMATOCOCCA, GLOMERELLA CINGULATA	VIRIDIPLANTAE: CHLOROPHYTA | FUNGI: DIKARYA	PLANT + FUNGI
Minc12831	A	THERMOTOGA MARITIMA, MARINITOGA PIEZOPHILA, THERMOTOGA PETROPHILA, THERMOTOGA SP, THERMOSIPHO MELANESIENSIS, GEOBACTER SULFURREDUCENS, GEOBACTER METALLIREDUCENS, THERMODESULFOVIBRIO YELLOWSTONII, CANDIDATUS KUENENIA, STUTTGARTIENSIS MYXOCOCCUS XANTHUS, VERRUCOMICROBIUM SPINOSUM, KOSMOTOGA OLEARIA, RUMINOCOCCUS TORQUES, ROSEBURIA INTESTINALIS, HALOTHERMOTHRIX ORENII, THERMOSINUS CARBOXYDIVORANS, A…	BACTERIA: PLANCTOMYCETES, BACTEROIDETES, FIRMICUTES, THERMOTOGALES, VERRUCOMICROBIA, DELTAPROTEOBACTERIA | FUNGI: DIKARYA	BACTERIA + FUNGI
Minc13286	A	PLASMODIUM FALCIPARUM, THEILERIA ANNULATA	PROTIST: APICOMPLEXA, ALVEOLATA	PROTIST
Minc13297	A	KOCURIA RHIZOPHILA, ARTHROBACTER CHLOROPHENOLICUS, ARTHROBACTER SP, STREPTOMYCES HYGROSCOPICUS, STREPTOMYCES VIRIDOCHROMOGENES, SACCHAROPOLYSPORA ERYTHRAEA, BACILLUS SUBTILIS, BACILLUS SUBTILIS, BACILLUS COAGULANS, BACILLUS CEREUS, BACILLUS AMYLOLIQUEFACIENS, BACILLUS LICHENIFORMIS, LEIFSONIA XYLI, MITSUOKELLA MULTACIDA, LACTOBACILLUS PLANTARUM, OENOCOCCUS OENI, CLOSTRIDIUM BEIJERINCKII, LACTOBAC…	BACTERIA: FIRMICUTES, ACTINOMYCETALES	BACTERIA
Minc13404	A	PARAMECIUM TETRAURELIA	PROTIST: CILIOPHORA	PROTIST
Minc13614	A	UNCULTURED SYMBIOTIC PROTIST OF CRYPTOCERCUS PUNCTULATUS	PROTIST: UNCULTURED	PROTIST
Minc13832	A	TRICHOMONAS VAGINALIS, MYCOPLASMA CAPRICOLUM, PETROTOGA MOBILIS	BACTERIA: THERMOTOGALES, TENERICUTES | PROTIST: TRICHOMONADIDA	BACTERIA + PROTIST
Minc14316	A	STAPHYLOCOCCUS PHAGE K, RUMINOCOCCUS SP, SHUTTLEWORTHIA SATELLES	BACTERIA: FIRMICUTES | VIRUS: BACTERIPHAGE K	BACTERIA
Minc14495	A	TRYPANOSOMA BRUCEI	PROTIST: TRYPANOSOMATIDAE	PROTIST
Minc14599	A	STREPTOMYCES LAVENDULAE, POLYSPHONDYLIUM PALLIDUM, AMYCOLATOPSIS MEDITERRANEI, DICTYOSTELIUM DISCOIDEUM, CLAVISPORA LUSITANIAE, CANDIDA TROPICALIS, COPRINOPSIS CINEREA, LACCARIA BICOLOR, USTILAGO MAYDIS	BACTERIA: ACTINOBACTERIA | PROTIST: AMOEBOZOA | FUNGI: DIKARYA	BACTERIA + PROTIST + FUNGI
Minc14716	A	VARIOVORAX PARADOXUS, AGROBACTERIUM RADIOBACTER, BURKHOLDERIA AMBIFARIA, BURKHOLDERIA SP, RALSTONIA SOLANACEARUM, BURKHOLDERIA UBONENSIS	BACTERIA: RHIZOBIALES, BURKHOLDERIALES	BACTERIA
Minc14967c	A	ENTAMOEBA DISPAR	PROTIST: AMOEBOZOA	PROTIST
Minc15863	A	MITSUOKELLA MULTACIDA, BACILLUS COAGULANS, LEIFSONIA XYLI, BACILLUS SUBTILIS, BACILLUS LICHENIFORMIS, BACILLUS AMYLOLIQUEFACIENS, BACILLUS CEREUS, STREPTOMYCES HYGROSCOPICUS, STREPTOMYCES VIRIDOCHROMOGENES, ARTHROBACTER CHLOROPHENOLICUS	BACTERIA: FIRMICUTES, ACTINOMYCETALES	BACTERIA
Minc16606	A	PHYTOPHTHORA INFESTANS	PROTIST: OOMYCETE	PROTIST
Minc16723	A	CHELATIVORANS SP, BEIJERINCKIA INDICA, POLYSPHONDYLIUM PALLIDUM, DICTYOSTELIUM DISCOIDEUM, GEOBACTER URANIIREDUCENS, ALKALILIMNICOLA EHRLICHII MLHE-1, PSEUDOMONAS AERUGINOSA, NOVOSPHINGOBIUM AROMATICIVORANS, METHYLOCELLA SILVESTRIS, CAULOBACTER SP, ROSEOBACTER SP, PHENYLOBACTERIUM ZUCINEUM, RALSTONIA SOLANACEARUM, CUPRIAVIDUS METALLIDURANS, RALSTONIA EUTROPHA, CUPRIAVIDUS TAIWANENSIS, PARACOCCUS …	BACTERIA: BETAPROTEOBACTERIA, DELTAPROTEOBACTERIA, ALPHAPROTEOBACTERIA, GAMMAPROTEOBACTERIA, CYANOBACTERIA, GNS BACTERIA, VERRUCOMICROBIA, HIGH GC GRAM+ BACTERIA | PROTIST: AMOEBOZOA | ARCHAEA: METHANOMICROBIA	BACTERIA + PROTIST + ARCHAEA
Minc16907	A	VITIS VINIFERA	VIRIDIPLANTAE: STREPTOPHYTA	PLANT
Minc17268	A	STREPTOMYCES SP	BACTERIA: ACTINOBACTERIA	BACTERIA
Minc17843	A	NOSTOC SP, THERMOMICROBIUM ROSEUM, SPHAEROBACTER THERMOPHILUS, PELODICTYON PHAEOCLATHRATIFORME, CHLOROBIUM LIMICOLA,CHLOROBIUM PHAEOBACTEROIDES, CHLOROBIUM FERROOXIDANS, CHLOROBIUM LUTEOLUM, CHLOROBIUM PHAEOVIBRIOIDES, CHLOROBACULUM PARVUM, CHLOROBIUM TEPIDUM, PROSTHECOCHLORIS AESTUARII, SPHINGOMONAS SP, METHYLOBACTERIUM RADIOTOLERANS, METHYLOBACTERIUM SP, METHYLOBACTERIUM NODULANS, MAGNETOSPIRIL…	BACTERIA: CYANOBACTERIA, BETAPROTEOBACTERIA, ALPHAPROTEOBACTERIA (RHIZOBIALES), GAMMAPROTEOBACTERIA, THERMOMICROBIA, PLANCTOMYCETIA, VERRUCOMICROBIA, CHLOROBIA	BACTERIA
Minc17844a	A	MESORHIZOBIUM LOTI, NITROSOCOCCUS OCEANI, SYNECHOCOCCUS SP, GEOBACTER SP, PSEUDOMONAS SYRINGAE, BURKHOLDERIA OKLAHOMENSIS, GLUCONACETOBACTER DIAZOTROPHICUS, BURKHOLDERIA PHYMATUM, BURKHOLDERIA SP, BURKHOLDERIA PHYTOFIRMANS, BURKHOLDERIA XENOVORANS, BURKHOLDERIA SP, BURKHOLDERIA GRAMINIS, BURKHOLDERIA THAILANDENSIS, BURKHOLDERIA OKLAHOMENSIS, BURKHOLDERIA MALLEI, BURKHOLDERIA PSEUDOMALLEI, BURKHOL…	BACTERIA: CYANOBACTERIA, BETAPROTEOBACTERIA, ALPHAPROTEOBACTERIA (incl. RHIZOBIALES), DELTAPROTEOBACTERIA, GAMMAPROTEOBACTERIA	BACTERIA
Minc18072	A	ARABIDOPSIS THALIANA, NICOTIANA GLUTINOSA, NICOTIANA ATTENUATA, PYRUS COMMUNIS, MALUS X DOMESTICA, PHYSCOMITRELLA PATENS, ROSA HYBRID CULTIVAR	VIRIDIPLANTAE: EMBRYOPHITA	PLANT
Minc18152	A	CANDIDA DUBLINIENSIS, CANDIDA ALBICANS, CANDIDA TROPICALIS, PELOBACTER CARBINOLICUS, MARINOMONAS SP, PSEUDOMONAS SYRINGAE, AZOTOBACTER VINELANDII, THIOMICROSPIRA CRUNOGENA, HAHELLA CHEJUENSIS, THIOBACILLUS DENITRIFICANS, MAGNETOCOCCUS SP, FUSOBACTERIUM MORTIFERUM, FUSOBACTERIUM SP, FUSOBACTERIUM NUCLEATUM, FUSOBACTERIUM SP, LEPTOTRICHIA GOODFELLOWII, BORRELIA GARINII, BORRELIA VALAISIANA, BORRELI…	BACTERIA: GAMMAPROTEOBACTERIA, ALPHAPROTEOBACTERIA, DELTAPROTEOBACTERIA, AQUIFICAE, FIRMICUTES, BACILIALES, FUSOBACTERIA, NITROSPIRAE, SPIROCHAETES, ACTINOBACTERIA, PLANCTOMYCETES, DICTYOGLOMI | FUNGI: DIKARYA	BACTERIA + FUNGI
Minc18364	A	ORYZA SATIVA INDICA GROUP, ORYZA SATIVA JAPONICA GROUP	VIRIDIPLANTAE: STREPTOPHYTA	PLANT
Minc18449	A	BURKHOLDERIA PSEUDOMALLEI	BACTERIA: BETAPROTEOBACTERIA	BACTERIA
Minc19145a	A	BACILLUS SELENITIREDUCENS	BACTERIA: FIRMICUTES	BACTERIA
Minc03310	A	POPULUS TRICHOCARPA	VIRIDIPLANTAE: STREPTOPHYTA	PLANT
